1 **A horizontally acquired expansin gene increases virulence of the emerging plant**  
2 **pathogen *Erwinia tracheiphila***

3 Jorge Rocha<sup>a,b\*#</sup>, Lori R. Shapiro<sup>a,c\*</sup>, Roberto Kolter<sup>a</sup>

4

5 #Address correspondence to Jorge Rocha, [jorge.rocha@ciad.mx](mailto:jorge.rocha@ciad.mx)

6 <sup>a</sup> Department of Microbiology, Harvard Medical School, Boston MA.

7 <sup>b</sup> Present Address: Conacyt-Centro de Investigación y Desarrollo en Agrobiotecnología  
8 Alimentaria, San Agustín Tlaxiaca, Mexico

9 <sup>c</sup> Present Address: Department of Applied Ecology, North Carolina State University,  
10 Raleigh, NC

11

12 \* JR and LRS contributed equally to this work.

13 Word count: Abstract 219, Main Text (Introduction, Results, Discussion) 4354

14

15 **Running title:** *An expansin increases Erwinia tracheiphila virulence*

16 #Address correspondence to Jorge Rocha, [jorge.rocha@ciad.mx](mailto:jorge.rocha@ciad.mx)

17 **Keywords:** expansin, virulence, glycoside hydrolase, *Cucurbita*, *Erwinia*, squash, plant  
18 cell wall, cellulose, pectin, horizontal gene transfer, plant pathogen, xylem

19

20 Author Contributions: JR and LRS conceived of the study. JR designed and conducted  
21 molecular protocols and lab experiments. LRS conducted computational analyses and  
22 performed experiments. JR, LRS and RK interpreted experimental data. JR and LRS  
23 wrote the first draft of the manuscript, and JR, LRS and RK added critical revisions.

24

25 **Data Deposition Statement:** Analysis scripts and input files associated with

26 reconstruction of phylogenetic trees are available at

27 <https://github.com/lshapiro31/gh5.expansin.phylogenetics>

28 **Abstract**

29 All land plants depend on proteins called ‘expansins’ that non-enzymatically loosen structural  
30 cellulose, enabling cell wall extension during normal growth. Surprisingly, expansin genes are  
31 also present – but functionally uncharacterized – in taxonomically diverse bacteria and fungi that  
32 do not produce cellulosic cell walls. Here, we find that *Erwinia tracheiphila*  
33 (Enterobacteriaceae), the causative agent of bacterial wilt of cucurbits, has horizontally acquired  
34 an operon with a microbial expansin (*exlx*) gene and a glycoside hydrolase family 5 (*gh5*) gene.  
35 *E. tracheiphila* is an unusually virulent plant pathogen that induces systemic wilt symptoms  
36 followed by plant death, and has only recently emerged into cultivated cucurbit populations in  
37 temperate Eastern North America. Plant inoculation experiments with deletion mutants show that  
38 EXLX-GH5 is a secreted virulence factor that confers efficient xylem movement and  
39 colonization ability to *E. tracheiphila*. Bacterial colonization of xylem blocks sap flow, inducing  
40 wilt symptoms and causing plant death. Together, these results suggest that the horizontal  
41 acquisition of the *exlx-gh5* locus was likely a key step driving the recent emergence of *E.*  
42 *tracheiphila*. The increase in *E. tracheiphila* virulence conferred by microbial expansins, the  
43 presence of this gene in many other bacterial and fungal wilt-inducing plant pathogen species,  
44 and the amenability of microbial expansins to horizontal gene transfer suggest this gene may be  
45 an under-appreciated virulence factor in taxonomically diverse agricultural pathogens.  
46

47 **Importance**

48 *Erwinia tracheiphila* is a bacterial plant pathogen that causes a fatal wilt infection in cucurbit  
49 crop plants. Here, we report that *E. tracheiphila* has horizontally acquired a microbial expansin  
50 gene (*exlx*) adjacent to a glycoside hydrolase family 5 (*gh5*) gene. Expansins are predominantly  
51 associated with plants due to their essential role in loosening structural cell wall cellulose during  
52 normal growth. We find that the EXLX and GH5 proteins in *E. tracheiphila* function as a single  
53 complex to facilitate xylem colonization, possibly by manipulating the size of xylem structures  
54 that normally exclude the passage of bacteria. This suggests that horizontal acquisition of the  
55 *exlx-gh5* locus was likely a key step in the recent emergence of *E. tracheiphila* as an unusually  
56 virulent plant pathogen. The presence of microbial expansin genes in diverse species of bacterial  
57 and fungal wilt-inducing pathogens suggests it may be an under-appreciated virulence factor for  
58 other microbes.

59

60 **Introduction**

61 The surfaces of all land plants are colonized by complex microbial communities. For a microbe,  
62 the ability to colonize a plant increases access to the nutritional resources produced by that plant  
63 (1-3). This has driven the evolution of diverse molecular mechanisms for plant colonization that  
64 can be found in commensal, beneficial and pathogenic microbes (4-6). A group of particularly  
65 intriguing, yet largely uncharacterized genes identified in an increasing number of plant-  
66 associated bacterial and fungal species encode proteins called ‘expansins’ (7-10). Expansins are  
67 non-enzymatic, two-domain proteins of ~250 amino acids; the N-terminal domain is related to  
68 glycoside hydrolase family 45 functional domains, and the C-terminal domain is related to grass  
69 pollen allergens (11-13). Expansin-coding genes are ubiquitous in all species of land plants and



70 green algae, where they fulfill the essential role of non-enzymatically loosening cell wall  
71 cellulose during normal growth of any rapidly expanding tissues (11, 14-18). In bacteria and  
72 fungi – which do not have cellulosic cell walls – expansin genes are variably present in species  
73 that interact with live or dead plant or algal matter (7, 8, 10, 19). The function(s) of expansins in  
74 microbes are unknown for almost all species, but are thought to promote colonization of plants  
75 through interactions with plant cell wall cellulose (7, 8, 20).

76 In the few microbial species where expansin functions have been empirically  
77 investigated, their contributions to plant colonization have been diverse. The microbial expansin  
78 in the plant commensal *Bacillus subtilis* (BsEXLX1) has only a fraction of the *in vitro* ability to  
79 extend plant cell walls compared to plant expansins, but BsEXLX1 deletion mutants are either  
80 severely impaired, or unable to successfully colonize the surface of maize roots (20, 21). In some  
81 species of plant beneficial fungi, expansins (also referred to as ‘swollenins’) increase fungal  
82 mutualistic capabilities towards plant hosts (22, 23). Expansin function has also been  
83 investigated in several pathogens. In the bacterial plant pathogen *Ralstonia solanacearum*, an  
84 expansin deletion mutant has decreased virulence (24), and in *Clavibacter michiganensis*, studies  
85 have described contradictory expansin roles for virulence and ability to colonize xylem (24-28).  
86 Overall, fundamental questions surrounding how microbial expansins mediate plant colonization  
87 in divergent genetic backgrounds and variable ecological contexts, and the molecular  
88 mechanism(s) by which microbial expansins interact with plant structural carbohydrates remain  
89 enigmatic (7, 8, 10, 19, 20, 24, 26, 29, 30).

90 The bacterial plant pathogen *Erwinia tracheiphila* Smith (Enterobacteriaceae), the  
91 causative agent of bacterial wilt of cucurbits, contains an operon with an expansin gene (*exlx*)  
92 and a gene fragment with a glycoside hydrolase family 5 functional domain (*gh5*) (8, 31-33). The

93 only geographic region where *E. tracheiphila* occurs is temperate Eastern North America, and it  
94 only infects species in two genera of cucurbit host plants: summer and winter squash (cultivars  
95 of *Cucurbita* spp.) and cucumber and muskmelon (*Cucumis sativus* and *Cucumis melo*) (34). The  
96 *E. tracheiphila* genome has undergone dramatic structural changes consistent with an  
97 evolutionarily recent emergence, including the horizontal acquisition of multiple genes likely  
98 important for virulence (34-38). Unlike most bacterial plant pathogens, *E. tracheiphila* cannot  
99 persist in environmental reservoirs, and instead is only transmitted by two species of highly  
100 specialized leaf beetle vectors (39-42). Bacterial cells can enter xylem when beetle frass  
101 containing *E. tracheiphila* is deposited near recent foliar feeding wounds or on floral nectaries  
102 (40, 43). Bacteria can then move systemically through xylem and block sap flow to induce  
103 systemic wilting, which is followed by plant death within 2-3 weeks after the first wilt symptoms  
104 appear (35, 44-46). *E. tracheiphila* costs farmers millions of dollars annually through direct yield  
105 losses and indirect control measures (34). Despite the economic burden caused by *E.*  
106 *tracheiphila*, no genetic determinants of bacterial pathogenesis or virulence have yet been  
107 empirically assessed.

108         Here, we characterize the role of the expansin-GH5 operon from *E. tracheiphila* for  
109 colonization of squash (*Cucurbita pepo*). First, we reconstruct the evolutionary histories of both  
110 the *exlx* and *gh5* open reading frames (ORFs), and find that the phylogenies of both *exlx* and *gh5*  
111 are consistent with horizontal acquisition by *E. tracheiphila*. Then, we create deletion mutants to  
112 determine the individual and combined roles of *exlx* and *gh5* for *E. tracheiphila* colonization of  
113 host plants. *In planta* inoculation experiments with the wild type and mutant strains show that  
114 these proteins are secreted, and suggest that they function as a single assembled EXLX-GH5  
115 complex. The EXLX-GH5 protein complex is necessary for *E. tracheiphila* to efficiently

116 colonize xylem, induce systemic wilt symptoms, and cause high rates of plant death. Together,  
117 these results suggest that the *exlx-gh5* locus as a non-canonical yet potent virulence factor, and  
118 horizontal acquisition of this locus was a key event driving the recent emergence of *E.*  
119 *tracheiphila* as a fatal plant pathogen that can efficiently colonize xylem. These findings  
120 highlight the continued risk of horizontal gene transfer driving an increase in pathogen virulence,  
121 and the continuing vulnerability of agricultural populations to invasion by pathogen variants or  
122 species with increased virulence.

123

## 124 **Results**

### 125 Identification of a locus with an expansin gene in *Erwinia tracheiphila*

126 A locus with two open reading frames (ORFs) flanked by mobile DNA elements was identified  
127 during manual curation of *ab initio* gene predictions in the *Erwinia tracheiphila* reference strains  
128 (31, 32) (Figure 1A). The first ORF, *Et-exlx* (AXF78871.1), is predicted to encode a protein  
129 product with 243 amino acids and both domains found in canonical expansin proteins (17, 47).  
130 The second ORF, *Et-gh5* (AXF77819.1), has 315 codons and is predicted to encode a putatively  
131 pseudogenized endo-1,4-beta-xylanase A precursor (EC 3.2.1.8) with a glycoside hydrolase  
132 family 5 (GH5) functional domain ([www.CAZy.org](http://www.CAZy.org)) (48). Many *Et-gh5* homologs in the NCBI  
133 *nr* database are between 415 – 450 amino acids, and RAST *ab initio* gene annotation predicts  
134 that the truncation to 315 amino acids eliminates cellulase activity and renders *Et-gh5* non-  
135 enzymatic (49). The sequences of both ORFs predict a signal peptide for secretion and a Signal  
136 Peptidase cleavage site (50), suggesting that the protein products are secreted and their function  
137 is extracellular.

138

139 Phylogenetic distribution of the *Erwinia tracheiphila* expansin and glycoside hydrolase family 5  
140 open reading frames

141 Because mobile DNA elements are common agents of horizontal gene transfer, the phylogenies  
142 of both the *exlx* and *gh5* genes were reconstructed and evaluated for conflict with the species  
143 phylogeny (37, 51-53). Homologs of both genes are only found in species that interact with live  
144 plants, or soil-dwelling species that likely interact with dead plant matter. The  $\gamma$ -proteobacterial  
145 expansin homologs are recovered as two distinct groups, separated by Firmicutes (Figure 1B).  
146 The expansin homologs in the Enterobacterial plant pathogens (*Pectobacterium* spp., *Dickeya*  
147 spp., *Pantoea stewartii* and *E. tracheiphila*) comprise one group, and the expansin homologs  
148 from Xanthomonadaceae comprise a second group (8). *Erwinia tracheiphila* and *Pantoea*  
149 *stewartii* are the only species with microbial expansin homologs from the *Erwinia* and *Pantoea*  
150 genera, respectively. This suggests that an expansin gene was horizontally acquired by an  
151 ancestral plant-associated Enterobacteriaceae species, and this original acquisition was followed  
152 by vertical and horizontal transmission between other plant-associated Enterobacteriaceae (8).  
153 The expansin phylogeny is consistent with additional horizontal gene transfer events, such as an  
154 expansin acquisition by the  $\beta$ -proteobacterial plant pathogen *Ralstonia solanacearum* from a  
155 Xanthomonadaceae donor (8, 10).

156 *Gh5* homologs have a relatively sparse distribution in bacteria and some plant pathogenic  
157 nematodes, and the *gh5* phylogeny is also consistent with multiple horizontal gene transfer  
158 events (Figure 1C). *Gh5* homologs are present in the genomes of Enterobacteriaceae, Firmicutes,  
159 Myxobacteria and  $\beta$ -proteobacteria that also have expansin genes. Homologs are also present in  
160 species of Bacteroidetes and  $\gamma$ -proteobacteria species that do not have expansin genes. In  
161 Enterobacteriaceae, the *gh5* homologs separate into three distinct groups. One group is

162 comprised of *Erwinia tracheiphila*, *Pantoea stewartii*, *Dickeya dianthicola*, and *Phaseolibacter*  
163 sp. (recently reclassified to Enterobacteriaceae (54)). The other plant-pathogenic *Dickeya* spp.  
164 comprise a second group of Enterobacterial *gh5* homologs, and plant-pathogenic *Pectobacterium*  
165 and *Brennaria* spp. are a third group.

166

167 *Distribution of expansin fusions to carbohydrate active domains in bacteria*

168 In approximately 10% of microbial species, expansin genes are fused to domains from  
169 carbohydrate active proteins (8, 10). Out of the hundreds of families of carbohydrate active  
170 domains in the CAZy database ([www.cazy.org](http://www.cazy.org)), only GH5 and carbohydrate binding module  
171 family 2 (CBM2) domains repeatedly co-occur with bacterial expansin genes (8, 48). Bacterial  
172 species that have an expansin co-occurring with a carbohydrate active domain are more likely to  
173 be xylem-colonizing pathogens (8). The co-occurrence of GH5 domains with expansins in  
174 bacterial plant pathogens is especially apparent (Figure 2).

175 A *gh5* homolog is present in the genomes of multiple plant-pathogenic *Pectobacterium*  
176 and *Dickeya* species that harbor an *exlx* homolog (Figure 1B, 1C). However, only three  
177 enterobacterial species (*Erwinia tracheiphila*, *Pantoea stewartii*, and *Dickeya dianthicola*) have  
178 the *exlx* and *gh5* ORFs in the same operon. In these three species, the *exlx* and *gh5* genes have  
179 distinct signal peptides and are separated by ~50 nucleotides. In *P. stewartii*, the *exlx-gh5* locus  
180 is on a plasmid (pDSJ08), which may increase the probability of acting as a donor for horizontal  
181 gene transfer.

182 Many plant pathogenic Xanthomonadaceae have a *gh5* domain fused to an *exlx* as a  
183 single ORF (8, 55). The *gh5* domain in Enterobacteriaceae is non-homologous to the GH5  
184 domain in Xanthomonadaceae, and the *exlx* and *gh5* domain structure in some

185 Enterobacteriaceae is in reverse orientation compared to the *gh5-exlx* domain order in  
186 Xanthomonadaceae. A distinct *gh5* domain that is truncated to 289 amino acids is found in  
187 *Clavibacter michiganensis (Cela)*, and this is the only known microbial expansin that is fused to  
188 both a GH5 and CBM2 domain in a single coding sequence (27). This suggests there have been  
189 at least three independent origins of an expansin adjacent or fused to a *gh5* family functional  
190 domain in bacterial plant pathogens. These multiple independent co-occurrences of bacterial  
191 expansins with evolutionarily distinct *gh5* domains may be an example of functional  
192 convergence.

193

194 *Expansin and GH5 genes both contribute to Erwinia tracheiphila virulence*

195         The functional significance of a microbial expansin co-occurring with a carbohydrate  
196 active domain has not yet been empirically tested. To evaluate the role of EXLX and GH5 to *E.*  
197 *tracheiphila* virulence – and the possible synergistic effects of both proteins together – we  
198 generated a deletion mutant of the complete operon (strain  $\Delta exlx-gh5$ ), and mutants in only the  
199 expansin ORF (strain  $\Delta exlx$ ) and only the GH5 ORF (strain  $\Delta gh5$ ). Strains that complemented  
200 the three deletion mutations ( $\Delta exlx-gh5(cEXLX-GH5)$ ,  $\Delta exlx(cEXLX)$  and  $\Delta gh5(cEXLX-GH5)$ ,  
201 respectively) were also constructed (Supplemental Table 1). Variation in virulence between the  
202 wild type (Wt), mutants and complemented strains were measured via squash seedling  
203 inoculation experiments. Virulence was compared by quantifying differences in the amount of  
204 time it took each strain to induce disease symptoms at three stages: 1) at initial wilt symptom  
205 development on the inoculated leaf, 2) at systemic spread of wilt symptoms to a second non-  
206 inoculated leaf, and 3) at plant death.

207 In plants inoculated with  $\Delta exlx-gh5$ , wilt symptoms were delayed in the inoculated leaf  
208 and in a second systemic leaf, and significantly fewer plants inoculated with  $\Delta exlx-gh5$  died  
209 (23%; 5 of 22) compared to plants inoculated with Wt (85%; 17 out of 20) (Figure 3A, Tables 1  
210 and 2). Wilt symptoms in plants inoculated with  $\Delta exlx-gh5$  were more likely to be localized to  
211 the inoculated leaf (*i.e.*, symptoms did not progress to systemic infection or plant death)  
212 compared to plants inoculated with Wt (Figure 4). The  $\Delta exlx-gh5$ (cEXLX-GH5) complemented  
213 strain had restored ability to induce wilting symptoms at a second non-inoculated leaf, and  
214 partially restored the mortality rate (60%; 13 out of 22).

215 Individual deletions of the *Et-exlx* and *Et-gh5* ORFs also caused a decrease in virulence  
216 compared to Wt (Figure 3, Tables 1-4). Plants inoculated with either  $\Delta exlx$  or  $\Delta gh5$  exhibited  
217 delays in the initial appearance of wilt symptoms in the inoculated leaf, delays in the appearance  
218 of systemic wilt symptoms in a second leaf and decreased mortality compared to Wt. Genetic  
219 complementation of  $\Delta exlx$  in strain  $\Delta exlx$ (cEXLX) did not restore the Wt ability to cause wilt  
220 symptoms in the inoculated leaf, but did restore the ability to cause systemic wilt symptoms and  
221 plant death (Figure 3A, Tables 1 and 2).

222 Promoter regions for expression of the *exlx-gh5* operon have not been characterized, but  
223 expression of individual ORFs in an operon is often directed from an upstream shared promoter.  
224 It is therefore reasonable to assume expression of the *gh5* ORF is directed from a shared  
225 promoter region upstream of *exlx* (56). For this reason, the single  $\Delta gh5$  mutant was  
226 complemented with the full operon (*exlx-eng*) to include the promoter region of *exlx*.  
227 Complementation of  $\Delta gh5$  with  $\Delta exlx-gh5$ (EXLX-GH5) restored the Wt ability to cause wilt  
228 symptoms in the inoculated leaf, systemic wilt symptoms in a second leaf, and plant death  
229 (Figure 3B Tables 3 and 4).

230

231 *The  $\Delta exlx-gh5$  mutant is impaired in systemic movement*

232 The correlation between within-plant movement of *E. tracheiphila* to systemic wilt symptom

233 development and plant death has been hypothesized, but not yet demonstrated (34, 57). It is

234 assumed that systemic movement of bacteria through xylem – along with bacterial replication

235 and increase in biomass far from the initial inoculation point – is necessary to occlude xylem

236 vessels to cause wilt symptoms and plant death (Figure 4) (34, 57). To explicitly test whether

237  $\Delta exlx-gh5$  has impaired within-host movement, squash seedlings were inoculated with either Wt

238 or  $\Delta exlx-gh5$ . At 12 DPI, bacteria were quantified at two sites in the same plant: the petiole of the

239 inoculated leaf, and the petiole of a second, non-inoculated leaf. At 12 DPI, all of the plants

240 inoculated with the Wt strain were systemically wilting, but none of the plants inoculated with

241  $\Delta exlx-gh5$  had wilt symptoms beyond the inoculated leaf. At the inoculation site of all plants, the

242 Wt and  $\Delta exlx-gh5$  both reached similar cell counts ( $>10^9$  CFU/g for Wt, and  $10^8$ - $10^9$  CFU/g for

243  $\Delta exlx-gh5$ ) (Figure 5). However, in a petiole of a second, non-inoculated leaf  $\Delta exlx-gh5$  only

244 reached cell counts of  $10^3$  CFU/g, while the Wt reached  $10^9$  CFU/g (Figure 5). The  $\Delta exlx-gh5$

245 strain does not have a growth deficiency *in vitro* compared to the Wt (Supplemental Figure 1),

246 showing that the attenuation of wilt symptom development and decrease in plant death rates

247 (Figures 3 and 4) is due to impaired systemic movement of  $\Delta exlx-gh5$  and not a difference in

248 growth rate *per se*.

249

250 *Systemic wilt symptoms are correlated with local *Erwinia tracheiphila* concentration*

251 A second inoculation experiment using only the  $\Delta exlx-gh5$  mutant was conducted to quantify

252 how wilt symptom severity is correlated with the ability of *E. tracheiphila* to move through, and



253 replicate in xylem beyond the inoculation point. Thirty plants were inoculated with *Δexlx-gh5*,  
254 and after 21 days symptoms in each plant were scored as either no symptom in any leaf  
255 (healthy), wilt symptoms restricted to the site of inoculation, systemic wilt symptoms beyond the  
256 inoculated leaf, or death. Bacteria were then quantified with CFU counts from the petiole of the  
257 inoculated leaf and a petiole of a second non-inoculated leaf.

258         At 21 DPI, 8 plants were healthy and had not developed any wilt symptoms, 12 only had  
259 wilt symptoms in the inoculated leaf, 10 had systemic wilting symptoms, and none had died  
260 (Figure 6). In the petiole of the inoculated leaf, the bacterial concentration reached  $\sim 10^8$  to  $10^9$   
261 CFU/g in 26 out of the 30 experimental plants regardless of symptom severity. Cell counts from  
262 the inoculation site were lower (below  $<10^7$  CFU/g) in the remaining 4 plants, three of which  
263 were healthy and one that had symptoms only in the inoculated leaf (Figure 6). In the petiole of a  
264 second non-inoculated leaf, bacterial concentration was correlated with overall severity of wilt  
265 symptoms, with lower severity corresponding to lower bacterial numbers. In 6 of the 8 healthy  
266 plants that did not develop any wilt symptoms, bacterial cells were undetectable at a non-  
267 inoculated leaf, and bacterial cells in a second non-inoculated leaf of the remaining two healthy  
268 plants were just barely over the  $\sim 10^3$  CFU/g threshold of detection (Figure 6). In the 12 plants  
269 that developed wilt symptoms only in the inoculated leaf, the bacterial numbers at a non-  
270 inoculated leaf were highly variable (ranging from  $10^4$  to  $10^8$  CFU/g). In 7 out of 10 systemically  
271 wilting plants, the bacterial concentration recovered at a second non-inoculated leaf was similar  
272 to the cell counts recovered at the local inoculation site ( $\sim 10^8$  CFU/g). These results explicitly  
273 correlate severity of wilt symptoms with the ability of *E. tracheiphila* to move systemically and  
274 increase in population far from the initial inoculation site to block xylem sap flow (Figure 4).  
275

276 Erwinia tracheiphila does not have cellulase or xylanase activity

277 All expansin proteins (from plants, bacteria, fungi, or other microbial eukaryotes) do not have a  
278 detectable enzymatic activity (7, 13, 19, 58). However, glycoside hydrolases are enzymes that  
279 break the glycosidic bond between two or more carbohydrate subunits, and the predominant  
280 target of these enzymes is cellulose (48). It is therefore possible that the *gh5* ORF adjacent to or  
281 fused to bacterial expansin genes in some species may confer enzymatic activity. To test whether  
282 the *gh5* ORF confers carbohydrate degrading ability to *E. tracheiphila*, the Wt strain (with the  
283 intact *exlx-gh5* locus) was evaluated for enzymatic degradation of cellulose and xylan, the two  
284 main structural components of plant cell walls and the putative targets of active GH5 enzymes  
285 (59). Neither *E. tracheiphila* culture supernatant nor colonies had detectable hydrolytic activity  
286 against cellulose or xylan (Supplemental Figure 2). The absence of enzymatic activity is  
287 consistent with previous results from both plant and microbial expansins where no enzymatic  
288 activity has ever been detected (7, 13, 19).

289

290 Neither flagella nor Type IV Pili contribute to Erwinia tracheiphila systemic xylem colonization

291 Type IV Pili and flagella are used by some bacterial plant pathogens during systemic  
292 movement through xylem (60-63). To assess whether these cellular components may also  
293 contribute to *E. tracheiphila* xylem colonization, deletion mutants were generated for Type IV  
294 Pili ( $\Delta T4P$ ) and flagella ( $\Delta fliC$ ) (Supplemental Table 1). In squash inoculation experiments, the  
295 virulence phenotypes of  $\Delta T4P$  and  $\Delta fliC$  mutants were indistinguishable from Wt. There was no  
296 difference in the development of wilt symptoms or death rate from inoculation with either  $\Delta T4P$ ,  
297  $\Delta fliC$ , or Wt (Figure 7, Tables 5 and 6). This indicates that neither Type IV Pili nor flagellar

298 movement contribute to xylem colonization by *E. tracheiphila*, although it is still possible that  
299 these loci contribute in other, more subtle, ways to pathogenesis.

300

301 *The Et-exlx-gh5 protein is secreted during infection*

302 To test whether the protein products of the *Et-exlx-gh5* locus are secreted (as predicted by the  
303 presence of signal peptides), plants were co-inoculated with a 1:1 mix of Wt &  $\Delta exlx-gh5$ .  
304 Successful restoration of  $\Delta exlx-gh5$  colonization from *in trans* complementation by the Wt strain  
305 would indicate that the EXLX and GH5 proteins provided by the Wt strain are secreted and  
306 function extracellularly. An equal number of plants were inoculated with only the Wt or only the  
307  $\Delta exlx-gh5$  mutant. In singly inoculated plants, the Wt or  $\Delta exlx-GH5$  reached the same  
308 concentration in the inoculated site at 1 DPI, but only the Wt was detected in a petiole of a non-  
309 inoculated leaf at 12 DPI (Figure 8A).

310 In co-inoculated plants, both Wt &  $\Delta exlx-gh5$  strains were present at similar  
311 concentrations at the inoculation site at 1 DPI (Figure 8B). After 12 days, two of the 4 plants co-  
312 inoculated with the 1:1 mix of Wt &  $\Delta exlx-gh5$  developed systemic wilt symptoms. In these two  
313 co-inoculated plants, the cell count of Wt in the petiole of a non-inoculated leaf reached  $10^7$ - $10^8$   
314 CFU/g, and the cell count of  $\Delta exlx-gh5$  reached  $10^5$ - $10^6$  CFU/g (Figure 8B). This is a notably  
315 higher cell count than  $\Delta exlx-gh5$  reaches at the same 12 day time point when singly inoculated  
316 ( $10^3$ - $10^4$  CFU/g) (Figure 5, Figure 8A). The ability of the Wt to partially rescue the systemic  
317 colonization defect of  $\Delta exlx-gh5$  *in trans* (when the Wt and  $\Delta exlx-gh5$  are co-inoculated)  
318 indicates that EXLX and GH5 are secreted and function extracellularly.

319 To test whether the EXLX and GH5 proteins function independently or as a single  
320 assembled unit, plants were co-inoculated with a 1:1 mix of  $\Delta exlx$  and  $\Delta gh5$ . The  $\Delta exlx$  deletion

321 mutant is expected to still secrete an intact GH5 protein, and the  $\Delta gh5$  deletion mutant is  
322 expected to still secrete an intact EXLX protein. If the EXLX and GH5 proteins function  
323 independently, the two strains would complement each other *in trans*. However, co-inoculating  
324 the  $\Delta exlx$  and  $\Delta gh5$  single deletion mutants did not rescue the attenuated virulence phenotype of  
325 the individual deletion mutants (Figure 9, Tables 7 and 8). This indicates that these proteins  
326 function as a single EXLX-GH5 protein complex that assembles before or during secretion, and  
327 therefore both proteins must be produced by the same cell.

328

## 329 **Discussion**

330 Here, we find that the emerging plant pathogen *Erwinia tracheiphila* has horizontally  
331 acquired an *exlx-gh5* locus that functions as a virulence factor by conferring the ability to  
332 systemically colonize xylem, block sap flow and cause high rates of plant death. The ability of a  
333 pathogen to move systemically through host vasculature – either plant xylem or animal  
334 cardiovascular systems – is a high-virulence phenotype, and is associated with development of  
335 more severe symptoms than localized infections (64, 65). The ability of a pathogen to reach a  
336 high titre and be distributed throughout the host's vasculature is also necessary for vector  
337 transmission by providing more opportunities for acquisition (64, 66). In *E. tracheiphila*, the  
338 development of systemic wilt symptoms induces a chemical volatile phenotype that attracts  
339 significantly more foraging vectors to wilting leaves (45, 67), and a physical phenotype that  
340 facilitates insect vector feeding – and increased pathogen acquisition opportunities – from  
341 symptomatic foliage (40, 45). This increase in virulence conferred by the *Et-exlx-gh5* locus  
342 induces more severe symptoms in infected plants that both attract obligate insect vectors to  
343 infected plants, and facilitates preferential feeding on wilting tissue once they arrive. Together,

344 this suggests that the horizontal acquisition of the *exlx-gh5* locus was a key step in the recent  
345 emergence of *E. tracheiphila* as a virulent wilt-inducing pathogen that is obligately insect vector  
346 transmitted (34, 37).

347 In ~10% of bacterial species that have expansin genes, the expansin is fused to domains  
348 from carbohydrate active proteins. The formation of new genes via fusions of multiple modular  
349 domains is a key source of evolutionary innovation for organisms across the tree of life (68, 69).  
350 Expansin co-occurrence with *gh5* domains is over-represented in pathogenic bacterial species  
351 that can move through xylem (8), suggesting there may be emergent properties of the EXLX-  
352 GH5 protein complex that are uniquely adaptive for xylem-colonizing plant pathogenic bacteria.  
353 Healthy plants have effective physical barriers to allow the flow of xylem sap while excluding  
354 bacteria; pit membranes between adjacent tracheids and perforation plates between xylem  
355 vessels are openings on a nanometric scale, while most bacteria are ~1 $\mu$ m (70). One hypothesis  
356 is that bacterial expansins may non-enzymatically ‘loosen’ the cellulose and pectin matrix at the  
357 perforation plates or at the pit membranes in order to increase their size enough to allow the  
358 passage of bacterial cells (71-74). The ability of *E. tracheiphila* Wt strain to complement  $\Delta$ *exlx-*  
359 *gh5 in trans* is consistent with the hypothesis that the EXLX-GH5 protein complex functions  
360 extracellularly by interacting with xylem structural carbohydrates that would normally prevent  
361 bacterial passage. This also suggests that, while the *Et-gh5* enzymatic activity has been lost due  
362 to truncation, the remaining fragment may have been neofunctionalized and is providing an  
363 essential (though mechanistically undefined) role in virulence. One possibility is that the *gh5*  
364 functional domain may physically (but non-enzymatically) interact with plant structural  
365 carbohydrates at perforation plates or pit membranes in a way that aids expansin function for  
366 loosening of cellulose microfibrils, or *vice versa*.

367           The distinct phylogenies of the *Et-exlx* and *Et-gh5* ORFs, and their genomic architecture  
368 as distinct genes in the same operon, may offer mechanistic insight into how bacterial expansins  
369 fuse to carbohydrate active domains. In many Firmicutes, *Pectobacterium* spp. and most *Dickeya*  
370 spp. plant pathogens, the *exlx* and *gh5* homologs are present in the same genome, but are not  
371 located directly adjacent to each other in the same operon. Only in *E. tracheiphila*, *P. stewartii*,  
372 and *D. dadantii* is the *exlx* homolog directly adjacent – but not fused to – the *gh5* homolog. This  
373 suggests that during a horizontal gene transfer event between an Enterobacteriaceae donor and  
374 recipient, an expansin integrated by random chance adjacent to a GH5, and the two ORFs in this  
375 operon are now being horizontally transferred together. The assembled protein complex  
376 produced by the *exlx-gh5* locus may provide a more efficient mode of action for movement  
377 through xylem, promoting the fitness of the host bacteria and providing opportunities for further  
378 horizontal transfer of this construct as a single virulence island. From a shared promoter and only  
379 ~50 nucleotide separation, a fusion of *exlx* and *gh5* into a single ORF is possible from a small  
380 deletion mutation. We also note that all three of the bacterial plant pathogens with this construct  
381 are agricultural pathogens emerging into intensively cultivated, homogeneous crop plant  
382 populations. *Erwinia tracheiphila* has recently emerged into cucurbit agricultural populations  
383 (34, 37) and *Pantoea stewartii* infects sweet corn (75). Both of these pathogen species only occur  
384 in temperate Eastern North America – one of the world’s most intensively cultivated regions –  
385 despite global distribution of susceptible host plants (76). *D. dianthicola* causes a virulent wilt  
386 disease and is emerging into cultivated potato crops, and is also geographically restricted to  
387 Eastern North America and Europe (77-79).

388           There is constant risk that agro-ecosystems will be invaded by virulent microorganisms,  
389 and the increasing homogeneity in crop plant populations may select for novel pathogens with

390 non-canonical virulence mechanisms. The recent realization that microbial expansin genes are  
391 present in phylogenetically diverse xylem-colonizing bacterial and fungal species – including  
392 almost all of the most economically damaging bacterial and fungal wilt pathogens – and the  
393 function of expansins to increase *E. tracheiphila* virulence suggest these genes may be an under-  
394 appreciated virulence factor (7, 8, 80, 81). The emergence of virulent plant pathogens that  
395 systemically colonize xylem is especially alarming because plants do not have inherent genetic  
396 resistance against xylem-dwelling vascular pathogens (82). That expansin genes can confer an  
397 increase in pathogen virulence, are present in many damaging wilt-inducing agricultural plant  
398 pathogens, and are amenable to horizontal gene transfer should raise concerns about whether this  
399 gene is a more important virulence factor of agricultural plant pathogens than currently  
400 recognized.

401

## 402 **Methods**

### 403 Study System

404 *E. tracheiphila* is one of the few plant pathogenic bacterial species that moves  
405 systemically through xylem and causes host death, compared to most species that cause localized  
406 foliar lesions (83). *E. tracheiphila* is obligately vector-transmitted by two species of highly  
407 specialized leaf beetles, the striped cucumber beetle *Acalymma vittatum* and the spotted  
408 cucumber beetle *Diabrotica undecimpunctata howardii* (Coleoptera: Chrysomelidae: Luperini:  
409 Diabroticina). These herbivores have co-evolved with wild *Cucurbita* spp. in the New World,  
410 and are among the only herbivores that can detoxify ‘cucurbitacins’ (oxygenated tetracyclic  
411 triterpene), which are a class of secondary metabolites produced by many Cucurbitaceae (35, 84,  
412 85). The striped cucumber beetle (*Acalymma vittatum*), which is obligately dependent on

413 *Cucurbita* in all life stages, is the predominant vector species driving *E. tracheiphila* epidemics  
414 (40, 67, 86). Striped cucumber beetles acquire *E. tracheiphila* by feeding on wilting, infective  
415 foliage, which is physically easier for them to consume than non-wilting foliage (36, 45). *E.*  
416 *tracheiphila* colonizes the beetle hindgut (40, 87-89), and beetles can transmit *E. tracheiphila*  
417 when frass (poop) from infective beetles is deposited near recent feeding wounds on foliage, or  
418 on floral nectaries (36, 40, 43, 86). The only known overwinter reservoir for *E. tracheiphila* is  
419 infective cucumber beetles, which diapause as adults and infect new seedlings in early spring  
420 when they emerge (39, 40, 45, 86, 89, 90).

421 *Erwinia tracheiphila* is an example of a plant pathogen that has recently emerged into a  
422 new ecological niche created by construction of homogeneous agro-ecosystems (34, 35, 37).  
423 Analysis of the *E. tracheiphila* genome shows this species has undergone among the most  
424 dramatic structural genomic changes of any bacterial pathogen, of any host species. These  
425 changes include genome decay through pseudogenization, invasion and proliferation of mobile  
426 genetic elements, and horizontal gene acquisitions. Together, these are the canonical genomic  
427 signatures of a recent specialization on a new host species or population (34, 37, 38). *Erwinia*  
428 *tracheiphila* only infects few species in two genera of the cosmopolitan plant family  
429 Cucurbitaceae. One of the genera that suffers economic losses, *Cucurbita* spp. (squash, pumpkin,  
430 zucchini and some gourds), are native to the New World tropics and subtropics (91, 92). Two  
431 *Cucumis* spp. (cucumber *Cucumis sativus*; and muskmelon *Cucumis melo*) native to the Old  
432 World tropics and subtropics are the most susceptible hosts to *E. tracheiphila* infection, and the  
433 introduction of highly susceptible *Cucumis* crop plants into temperate Eastern North America  
434 likely drove the recent emergence of this pathogen (93-95). While these susceptible cucurbit



435 cultivars are among the highest acreage crop plants globally (<http://www.fao.org/faostat/>), *E.*  
436 *tracheiphila* only occurs in temperate Eastern North America (34, 96).

437

438 *Bacterial strains, culture media and plant cultivation*

439 All bacterial strains used in this study are listed in Supplemental Table 1. Throughout this work,  
440 we used a rifampicin resistant variant of *Erwinia tracheiphila* BHKYR (Wt) (34). *Escherichia*  
441 *coli* TOP10 and PIR1 strains for used for routine cloning, and the *E. coli* strain S17-1 $\lambda$  was used  
442 as the donor for conjugation. *E. tracheiphila* was grown in KB liquid media or agar at room  
443 temperature (RT), and *E. coli* strains in LB media or agar at 37°C, unless otherwise specified.

444 Antibiotics were added to liquid or agar media at the following concentrations: rifampicin, 50  
445  $\mu\text{g/ml}$ ; ampicillin or carbenicillin, 100  $\mu\text{g/ml}$ ; chloramphenicol 5  $\mu\text{g/ml}$ ; kanamycin 50  $\mu\text{g/ml}$ .

446 All *in planta* experiments were conducted with organic ‘Dixie’ variety crookneck squash bought  
447 from Johnny’s Seeds (<https://www.johnnyseeds.com/>). Plants were grown in potting mix in  
448 standard six cell seedling trays in a greenhouse environment set to 25°C, 70% humidity, and a 12  
449 hr day: 12hr night light cycle.

450

451 *Visualization of fluorescent Erwinia tracheiphila in wilting squash seedlings*

452 *E. tracheiphila* BuffGH was transformed with a plasmid carrying the mCherry gene for  
453 visualization of fluorescent cells in symptomatic squash seedlings. Competent *E. tracheiphila*  
454 were prepared as described previously (34, 97). Briefly, cells were prepared by growing *E.*  
455 *tracheiphila* to an OD<sub>600</sub> of 0.02. Cells were then washed with decreasing volumes, once with  
456 chilled sterile Milli-Q water and twice with 10% glycerol, and resuspended in 1/100 volume of  
457 chilled 10% glycerol. Plasmid pMP7605 was used for electroporation in a 0.2-cm cuvette, at 2.5

458 kV for 5.2 to 5.8 ms. Cells were incubated at room temperature without shaking for 1 h in 3 ml  
459 KB liquid and then plated in KB agar with ampicillin. Colonies of fluorescent *E. tracheiphila Et*  
460 (pMP605) were obtained after 5 days at room temperature. Ten µl of a *Et* (pMP7605) stationary  
461 culture were used for inoculating two week-old squash seedlings (at the two leaf stage), and  
462 confocal microscopic observations were performed once symptoms appear using fresh  
463 longitudinal cuts of the inoculated petiole.

464

465 *Phylogenetic reconstruction of the expansin and endoglucanase genes and comparison of*  
466 *domain architecture*

467 The amino acid sequences of the expansin (WP\_046372116.1) and *gh5* (WP\_016193008.1)  
468 ORFs in the *Erwinia tracheiphila* reference strain (31) were used as queries to identify expansin  
469 and *gh5* homologs using the BLASTP web interface (98). A taxonomically representative sample  
470 of the top BLASTP hits for each gene were aligned using MAFFT v. 7.305b and default  
471 parameters (99). The expansin alignment was trimmed visually such that the two canonical  
472 expansin domains were conserved in the alignment, and the *gh5* alignment was trimmed with  
473 trimAI using the –automated 1 option (100). For both alignments ProtTest v. 3.4.2 was used to  
474 identify the best-fitting substitution model by BIC score, which was WAG+G for the expansin  
475 gene alignment and LG+I+G for the GH5 alignment (101). The GyrB species tree was  
476 constructed by using the *E. tracheiphila* GyrB sequence (KKF36621.1) as a query on the  
477 BLASTP web interface (98). The GyrB amino acid sequences from species known to have an  
478 expansin gene or an expansin fusion to a domain from a carbohydrate active protein were  
479 downloaded and added to a multi-fasta. The GyrB sequences were aligned with MAFFT v.  
480 7.305b and default parameters (99).

481 Phylogenetic trees were reconstructed using maximum likelihood with RAxML (102) and  
482 the appropriate evolutionary model on the CIPRES server (103). The expansin tree was  
483 reconstructed with 1000 bootstrap pseudoreplicates, and the GH5 and GyrB trees were  
484 reconstructed with 100 bootstrap pseudoreplicates. The bootstrapped pseudosamples were  
485 summarized with SumTrees v. 4.4.0 (104). The resulting phylogeny was visualized in the R  
486 statistical environment using the ggtree library (105, 106). Amino acid sequences were analyzed  
487 with NCBI CBD tool to identify domain architecture (47), and signal peptides were predicted  
488 with SignalP (50). The genomic context of the *Et-exlx-gh5* locus was visualized with genoPlotR  
489 (107). Alignment files and phylogenetic scripts are available at  
490 <https://github.com/lshapiro31/gh5.expansin.phylogenetics>.

491

#### 492 Construction of deletion mutants

493 Mutants with a deletion in the *exlx-gh5* operon, *exlx* gene, *gh5* gene, the Type IV pili operon and  
494 the *fliC* gene were generated from an *E. tracheiphila* isolate BHKYR parental strain by double  
495 homologous recombination, using the suicide plasmid pDS132 (108). This plasmid was  
496 improved by inserting in the *XbaI* site, a constitutive *mCherry* gene amplified from plasmid  
497 pMP7605 (109) using primers JR72 and JR73 (Supplemental Table 2). The resulting plasmid  
498 (pJR74, Supplemental Table 1) allows rapid screening of conjugants colonies and colonies that  
499 have lost the plasmid. For the target genomic region to create each mutant, regions upstream of  
500 the target locus were amplified with primers pair F5 and R5, and downstream regions were  
501 amplified with primer pair F3 and R3 (See Supplemental Table 2 for specific primer names and  
502 sequences). An ampicillin resistance *bla* gene, coding for Beta-lactamase was amplified from  
503 pDK46 (97) using primers LS23 and LS24. Constructions consisting on each upstream and

504 downstream region flanking the *bla* gene were used for *exlx-gh5*, *gh5*, *fliC* and Type 4 Pili  
505 mutants, while a construction with no flanked antibiotic cassette was prepared for the *exlx*  
506 deletion. All constructions were assembled using the Gibson Assembly Master Mix (New  
507 England Biolabs, Ipswich, MA), and then each was reamplified with nested primers containing  
508 *SacI* restriction site (primers *SacI-F* and *SacI-R*, Supplemental Table 2). Constructions for *exlx-*  
509 *gh5*, *exlx*, *gh5*, *fliC* and Type 4 Pili deletion were inserted into the *SacI* site of plasmid pJR74,  
510 obtaining plasmids pJR150, pJR323, pJR324, pJR74a and pJR149, respectively (Supplemental  
511 Table 1). These plasmids were transformed into *Ec*-PIR1 for preservation, and then into *Ec*-S17  
512 for conjugation using *E. tracheiphila* as recipient. MCherry fluorescent *E. tracheiphila*  
513 conjugants were obtained in KB agar with rifampicin and chloramphenicol, then a few colonies  
514 were picked and grown in 3 ml liquid KB with chloramphenicol to stationary phase, and 100  $\mu$ l  
515 were spread in KB agar with 5% sucrose and carbenicillin (or no antibiotic in the case of *exlx*  
516 deletion). Non-fluorescent, chloramphenicol-sensitive colonies were picked, PCR checked for  
517 the correct deletion and cryogenically stored in 15% glycerol at -80C.

518

### 519 Genetic complementation

520 A new integration plasmid, specific for a neutral region in the chromosome of *Et*-  
521 BHKYR, was constructed from plasmid pJR74. To create this plasmid, two  $\approx$ 0.8 Kb adjacent  
522 DNA fragments were PCR amplified from *Et*-BHKYR genomic DNA using primer pairs JR143-  
523 JR144, and JR145-JR146 (Supplemental Table 2). These fragments were ligated using the  
524 Gibson Assembly Master Mix (New England Biolabs, Ipswich MA), and reamplified using  
525 primers JR143 and JR146. The  $\approx$ 1.6 Kb product was inserted in the *SacI* site of pJR74,  
526 generating plasmid pJR315 (Supplemental Table 1). Single cutting *XhoI* and *BglII* sites were

527 engineered in the middle of the amplified neutral regions, which can be used for the insertion of  
528 complementation genes. For the complementation of the *exlx-gh5* locus or the individual *exlx*  
529 gene, the genomic region together with its natural promoter were amplified from *E. tracheiphila*  
530 genomic DNA using primers JR152 and JR154, or JR152 and JR153 (Supplemental Table 2)  
531 respectively, and DNA products were inserted into the *XhoI* site of pJR315. Each resulting  
532 plasmid was transformed into *Ec*-S17-1 $\lambda$  cells, which were then used as donors for conjugation  
533 with mutant strains  $\Delta exlx-gh5$ ,  $\Delta exlx$  or  $\Delta gh5$  as recipients. Conjugant colonies were used for  
534 negative selection with sucrose, as described above, and colonies carrying the *exlx-gh5* operon or  
535 the *exlx* gene integrated in the expected site were confirmed by PCR.

536

#### 537 *In planta inoculation experiments*

538 *In planta* virulence assays were performed by inoculating squash seedlings with *E. tracheiphila*  
539 Wt and derived strains, and monitoring wilt symptom development for approximately three  
540 weeks (between 21-25 days per experiment). To create inoculum, one bacterial colony of each  
541 strain was picked and added to 3 ml of liquid KB media with the appropriate antibiotic, and  
542 grown with shaking for 24 h. Then, 2-3 week-old squash seedlings (2-3 true leaves) were  
543 inoculated by manually inducing a wound where xylem was exposed in the petiole at the base of  
544 the first true leaf and adding 10  $\mu$ l of culture containing  $\approx 1 \times 10^7$  bacterial cells directly into the  
545 wound. Plants were kept at 25°C, 70% humidity, and a 12 hr day: 12hr night light cycle 25C, and  
546 monitored daily for appearance of first symptoms in the inoculated leaf, appearance of wilt  
547 symptoms in a second non-inoculated leaf, and plant death.

548

#### 549 *In planta Colony Forming Unit (CFU) counts*

550 Bacterial colony forming units (CFU) counts were determined from plants inoculated with *Et-*  
551 BHKY and derived strains. Bacterial cells can be obtained directly from petioles of infected  
552 plants (Figure 4D). Two cm samples of the petiole from the inoculated leaf, or from a second  
553 non-inoculated leaf were cut from the plants and washed briefly with 70% ethanol (EtOH).  
554 Excess EtOH was removed with a paper towel and petioles were surface-sterilized over a gas  
555 flame for 1 second and placed in a sterile plastic petri dish. From each petiole sample, 10-15  
556 disks small disks (<1 mm) were manually cut with a sterile blade and collected in a 2 ml  
557 microtube. The weight of each 2ml tube with all leaf disks was recorded to be used for  
558 normalizing CFU per gram of plant tissue in each sample, and 500  $\mu$ l of chilled PBS was added  
559 to each tube. After an incubation of 40 min on ice (vortexing every 10 min) 200  $\mu$ l of PBS from  
560 each tube was pipetted into a new microtube and used for serial dilutions and plating onto KB  
561 agar with rifampicin. Bacterial CFU per gram of fresh tissue was calculated.

562 For obtaining CFUs of individual strains in plants co-inoculated with *E. tracheiphila* Wt  
563 and  $\Delta exlx-gh5$  mutant, serial dilutions were plated in both KB with rifampicin and KB with  
564 rifampicin and carbenicillin agar plates. CFU of carbenicillin resistant colonies represent the  
565  $\Delta exlx-gh5$  strain. CFUs of Wt was determined as the count of total CFUs – carbenicillin resistant  
566 CFUs.

567

### 568 Statistics

569 Statistical analyses were performed using Prism version 7.0 (GraphPad Software, La Jolla  
570 California USA, [www.graphpad.com](http://www.graphpad.com)). Curves following initial symptoms in first leaf, systemic  
571 wilt in second leaf, and plant death from each experiment were compared using the built-in Log-  
572 rank (Mantel-Cox) test for survival analysis. In the cases where significant differences were

573 found ( $p < 0.05$ ), pairwise comparisons were tested using the same analysis (110). For  
574 comparisons of bacterial CFU *in planta*, CFU data and its  $\log_{10}$ -transformed values were checked  
575 for Gaussian distribution using the Shapiro-Wilk normality test. Since neither CFU data  
576 distribution nor the transformed  $\log_{10}$  values distribution passed the normality test, the Kruskal-  
577 Wallis non-parametric was used test to analyze if the medians vary significantly among  
578 experimental groups ( $p < 0.05$ ). In the cases where differences were found, Dunn's multiple  
579 comparisons test was used to test for pairwise differences between groups.

580

#### 581 Testing for cellulase and xylanase activity

582 Cellulase activity from cell-free supernatants of Wt and  $\Delta exlX-gh5$  cultures were tested for  
583 extracellular enzymatic activity against cellulose. The Wt and  $\Delta exlX-gh5$  strains were grown in  
584 10 ml of liquid KB media for 48 H. Cultures were centrifuged at 7,000 rpm for 10 min, and each  
585 supernatant was filter-sterilized. Supernatants and 1 mg/ml cellulase (Sigma), were spotted in 1%  
586 agar, 1% Carboxy Methyl Cellulose (CMC) plates. Plates were then incubated at 30°C for 48 h,  
587 and flooded with Gram's Iodine. Halos were imaged after 24 h at RT.

588         A colony of *E. tracheiphila* grown on KB agar plates was used to test for extracellular  
589 xylanase activity. A xylanase producing strain of *Streptomyces lividens* was used as a positive  
590 control. Bacterial culture from each species was spotted on the surface of a KB agar plate, and  
591 grown at RT for 4 days. An overlay of 1% agar and 1% xylan was spread on top of the grown  
592 colonies, and plates were incubated at 30°C for 48 h. Plates were flooded with 1% congo red and  
593 incubated for 10 min before discarding the congo red solution. Plates were then flooded with 1N  
594 NaOH, and incubated for 10 min. NaOH was discarded and plates were imaged after 24 h at  
595 room temperature.

596

597 **Acknowledgements**

598 This work was supported by Fundación Mexico en Harvard, and Conacyt grant 237414 to JR,

599 NSF postdoctoral fellowship DBI-1202736 to LRS and NIH Grant GM58213 to RK.

600 We thank all members of the Kolter lab, and Einat Segev, William R. Chase and Olga

601 Zhaxybayeva for valuable feedback and discussion. We thank the staff at the Harvard Arnold

602 Arboretum for assistance in plant cultivation, use of growth facilities and use of the confocal

603 microscope. Dominique Schneider kindly donated the plasmid pDS132.

604

605 **Tables**

606

607 **Table 1.** Summary of *in planta* inoculation experiment comparing virulence traits between

608 strains Wt,  $\Delta exlx-gh5$  mutant,  $\Delta exlx-gh5$  (cEXLX-GH5) complemented mutant,  $\Delta exlx$  mutant

609 and  $\Delta exlx$  (cEXLX) complemented mutant (corresponding to Figure 3A).

610

| Inoculated strain                | No. of plants (% of total) |                        |                           |             | Average no. of days until:   |                                  |       |
|----------------------------------|----------------------------|------------------------|---------------------------|-------------|------------------------------|----------------------------------|-------|
|                                  | Total inoculated           | Showing local symptoms | Showing systemic symptoms | Died        | Local symptoms in first leaf | Systemic symptoms in second leaf | Death |
| Wt                               | 20                         | 22<br>(100%)           | 20<br>(100%)              | 17<br>(85%) | 7.40                         | 13.70                            | 15.29 |
| $\Delta exlx-gh5$                | 22                         | 22<br>(100%)           | 20<br>(91%)               | 5<br>(22%)  | 10.45                        | 17.65                            | 19.40 |
| $\Delta exlx-gh5$<br>(cEXLX-GH5) | 22                         | 22<br>(100%)           | 22<br>(100%)              | 13<br>(59%) | 10.14                        | 14.77                            | 16.31 |
| $\Delta exlx$                    | 24                         | 24<br>(100%)           | 23<br>(95%)               | 12<br>(50%) | 10.29                        | 17.43                            | 20.33 |
| $\Delta exlx$<br>(cEXLX)         | 24                         | 24<br>(100%)           | 24<br>(100%)              | 15<br>(62%) | 8.83                         | 14.46                            | 15.53 |

611

612

613

614 **Table 2.** Log-rank (Mantel-Cox) tests for assessing statistical differences in virulence between

615 Wt,  $\Delta exlx-gh5$  mutant,  $\Delta exlx-gh5$  (cEXLX-GH5) complemented mutant,  $\Delta exlx$  mutant and  $\Delta exlx$



616 (cEXLX) complemented mutant via *in planta* inoculation experiments (corresponding to Figure  
617 3A).

618

| Compared treatment groups           | First leaf symptoms |                | Second systemic leaf symptoms |                | Death of plants |                |
|-------------------------------------|---------------------|----------------|-------------------------------|----------------|-----------------|----------------|
|                                     | Chi square          | <i>p</i> value | Chi square                    | <i>p</i> value | Chi square      | <i>p</i> value |
| All groups                          | 17.45               | 0.0016         | 28.51                         | <0.0001        | 22.02           | 0.0002         |
| Wt vs $\Delta exlx-gh5$             | 9.787               | 0.0018         | 16.4                          | <0.0001        | 20.87           | <0.0001        |
| Wt vs $\Delta exlx-gh5$ (cEXLX-GH5) | 11.04               | 0.0009         | 1.5                           | 0.2206         | 3.939           | 0.0472         |
| Wt vs $\Delta exlx$                 | 12.09               | 0.0005         | 16.44                         | <0.0001        | 9.348           | 0.0022         |
| Wt vs $\Delta exlx$ (cEXLX)         | 4.321               | 0.0376         | 0.9923                        | 0.3192         | 2.497           | 0.1141         |

619

620

621

622 **Table 3.** Summary of *in planta* inoculation experiment comparing virulence traits of Wt,  $\Delta gh5$

623 mutant and  $\Delta gh5$  (cEXLX-GH5) complemented mutant (corresponding to Figure 3B).

624

| Inoculated strain        | No. of plants (% of total) |                        |                           |          | Average no. of days until:   |                                  |       |
|--------------------------|----------------------------|------------------------|---------------------------|----------|------------------------------|----------------------------------|-------|
|                          | Total inoculated           | Showing local symptoms | Showing systemic symptoms | Died     | Local symptoms in first leaf | Systemic symptoms in second leaf | Death |
| Wt                       | 22                         | 22 (100%)              | 18 (81%)                  | 17 (77%) | 11.82                        | 13.61                            | 18.82 |
| $\Delta gh5$             | 21                         | 12 (57%)               | 8 (38%)                   | 6 (28%)  | 13.25                        | 15.38                            | 19.33 |
| $\Delta gh5$ (cEXLX-GH5) | 22                         | 21 (95%)               | 14 (66%)                  | 13 (59%) | 12.67                        | 13.00                            | 18.54 |

625

626

627 **Table 4.** Log-rank (Mantel-Cox) tests for assessing statistical differences in virulence between

628 strains Wt,  $\Delta gh5$  mutant and  $\Delta gh5$  (cEXLX-GH5) complemented mutant (corresponding to

629 Figure 3B).

630

| Compared treatment groups | First leaf symptoms |                | Second systemic leaf symptoms |                | Death of plants |                |
|---------------------------|---------------------|----------------|-------------------------------|----------------|-----------------|----------------|
|                           | Chi                 | <i>p</i> value | Chi                           | <i>p</i> value | Chi             | <i>p</i> value |

|                                | square |        | square |        | square |        |
|--------------------------------|--------|--------|--------|--------|--------|--------|
| All groups                     | 15.53  | 0.0004 | 9.216  | 0.01   | 9.833  | 0.0073 |
| Wt vs $\Delta gh5$             | 14.11  | 0.0002 | 9.906  | 0.0016 | 10.25  | 0.0014 |
| Wt vs $\Delta gh5$ (cEXLX-GH5) | 1.059  | 0.3034 | 0.8276 | 0.363  | 1.187  | 0.276  |

631  
632

633 **Table 5.** Summary of *in planta* inoculation experiment comparing virulence traits between  
634 strains Wt,  $\Delta fliC$  mutant and  $\Delta T4P$  mutant (corresponding to Figure 7).

| Inoculated strain | No. of plants (% of total) |                        |                           |          | Average no. of days until:   |                                  |       |
|-------------------|----------------------------|------------------------|---------------------------|----------|------------------------------|----------------------------------|-------|
|                   | Total inoculated           | Showing local symptoms | Showing systemic symptoms | Died     | Local symptoms in first leaf | Systemic symptoms in second leaf | Death |
| Wt                | 21                         | 21 (100%)              | 21 (100%)                 | 14 (66%) | 9.43                         | 13.62                            | 18.86 |
| $\Delta fliC$     | 22                         | 22 (100%)              | 22 (100%)                 | 13 (59%) | 10.23                        | 13.45                            | 17.54 |
| $\Delta T4P$      | 17                         | 17 (100%)              | 17 (100%)                 | 9 (52%)  | 9.18                         | 14.53                            | 19.67 |

635  
636

637 **Table 6.** Log-rank (Mantel-Cox) tests for assessing statistical differences in virulence between  
638 strains Wt,  $\Delta fliC$  mutant and  $\Delta T4P$  mutant (corresponding to Figure 7).

639

| Compared treatment groups | First leaf symptoms |                | Second systemic leaf symptoms |                | Death of plants |                |
|---------------------------|---------------------|----------------|-------------------------------|----------------|-----------------|----------------|
|                           | Chi square          | <i>p</i> value | Chi square                    | <i>p</i> value | Chi square      | <i>p</i> value |
| All groups                | 1.623               | 0.6543         | 1.324                         | 0.7235         | 2.156           | 0.5406         |

640  
641

642 **Table 7.** Summary of *in planta* inoculation experiment comparing virulence traits between  
643 mutant strains  $\Delta exlx$ ,  $\Delta gh5$  and a 1:1 mix of both  $\Delta exlx$  and  $\Delta gh5$  mutants (corresponding to  
644 Figure 9).

645

| Inoculated strain | No. of plants (% of total) |                        |                           |         | Average no. of days until:   |                                  |       |
|-------------------|----------------------------|------------------------|---------------------------|---------|------------------------------|----------------------------------|-------|
|                   | Total inoculated           | Showing local symptoms | Showing systemic symptoms | Died    | Local symptoms in first leaf | Systemic symptoms in second leaf | Death |
| $\Delta exlx$     | 18                         | 15 (83%)               | 8 (44%)                   | 3 (16%) | 9.33                         | 16.25                            | 17.33 |

|                                       |    |             |            |            |       |       |       |
|---------------------------------------|----|-------------|------------|------------|-------|-------|-------|
| $\Delta gh5$                          | 18 | 16<br>(88%) | 8<br>(44%) | 4<br>(22%) | 11.69 | 16.88 | 17.25 |
| $\Delta exlx$ and<br>$\Delta gh5$ mix | 18 | 15<br>(83%) | 8<br>(44%) | 4<br>(22%) | 11.11 | 14.76 | 19.05 |

646  
647

648 **Table 8.** Log-rank (Mantel-Cox) statistical test results for experiment comparing virulence of  
649 mutant strains  $\Delta exlx$ ,  $\Delta gh5$  and a 1:1 mix of both  $\Delta exlx$  and  $\Delta gh5$  mutants (corresponding to  
650 Figure 9).

651  
652

| Compared treatment groups | First leaf symptoms |                | Second systemic leaf symptoms |                | Death of plants |                |
|---------------------------|---------------------|----------------|-------------------------------|----------------|-----------------|----------------|
|                           | Chi square          | <i>p</i> value | Chi square                    | <i>p</i> value | Chi square      | <i>p</i> value |
| All groups                | 0.5335              | 0.7659         | 0.05808                       | 0.9714         | 0.2023          | 0.9038         |

653  
654

### 655 **Figure captions**

656 **Figure 1. Genomic context and phylogenies of the expansin and glycoside hydrolase 5 genes**  
657 **in *Erwinia tracheiphila***

658 **A)** Genomic context of the expansin (*exlx*) and glycoside hydrolase 5 (*gh5*) open reading frames  
659 (ORFs) in *Erwinia tracheiphila*. The ORFs and intergenic spaces are drawn to scale, with the  
660 black line representing position on the chromosome, and each ORF as an arrow color-coded  
661 according to *ab initio* annotated function. The scale bar is the length in nucleotides of the ORFs  
662 and intergenic spaces.

663 **B)** Distribution of expansin (*exlx*) homologs in a taxonomically representative set of bacterial  
664 species. Branches are colored according to taxonomic assignments. The tree was reconstructed  
665 using maximum likelihood and should be considered unrooted. Numbers at nodes are bootstrap  
666 pseudoreplicate supports, and the scale bar is the number of amino acid substitutions per site.

667 C) Distribution of glycoside hydrolase 5 (*gh5*) homologs in a taxonomically representative set of  
668 species. Branches are colored according to taxonomic assignments, using the same color  
669 assignments as Figure 1B. The tree was reconstructed using maximum likelihood and should be  
670 considered unrooted. Numbers at nodes are bootstrap pseudoreplicate supports, and the scale bar  
671 is the number of amino acid substitutions per site.

672

673 **Figure 2. Co-occurrence of expansin genes with carbohydrate active domains.** The GyrB  
674 species tree of selected bacteria with an expansin gene, and several species without expansins.  
675 The expansin and carbohydrate active domains are depicted as arrows if that species has an  
676 expansin gene, and the rectangles within the arrows indicate whether that ORF has an expansin  
677 domain, a carbohydrate active domain, or both. Homologous carbohydrate active domains are  
678 color-coded. Both expansin genes are shown for *Streptomyces scabiei*, the only microbial species  
679 to harbor two expansin homologs with signal peptides for secretion. Accession numbers of the  
680 depicted protein sequences, and accession numbers of several expansin homologs that do not  
681 have predicted signal peptides for secretion and are not depicted in the figure, can be found in  
682 Supplemental Table 3. The domains are drawn to scale. The tree was reconstructed using  
683 maximum likelihood with 100 bootstrap pseudoreplicates and should be considered unrooted.

684

685 **Figure 3. Contribution of the *Erwinia tracheiphila* *exlx-gh5* locus to wilt symptom**  
686 **development and plant death A)** *In planta* inoculation experiment comparing virulence of Wt,  
687  $\Delta exlx-gh5$ ,  $\Delta exlx-gh5$  (cEXLX-GH5),  $\Delta exlx$  and  $\Delta exlx$ (cEXLX) strains. **B)** A second *in planta*  
688 inoculation experiment comparing virulence of Wt,  $\Delta gh5$ , and  $\Delta gh5$ (cEXLX-GH5). In both **A)**  
689 **and B)**, inoculated plants were monitored for first appearance of wilt symptoms in the inoculated

690 leaf, first appearance of systemic wilt symptoms in a second non-inoculated leaf and plant death  
691 for 23 days post inoculation (DPI). Summary and statistical analyses are in Tables 1-4. All  
692 samples sizes were between 18-22 individual plants per treatment.

693

694 **Figure 4. Visual comparison of wilt symptoms in squash seedlings after inoculation with**  
695 **either the  $\Delta exlx-gh5$  mutant or wild type *Erwinia tracheiphila*.**

696 **A)** Non-inoculated squash seedling with no wilt symptoms **B)** Squash seedling inoculated with

697 wild type *E. tracheiphila* that has developed systemic wilt symptoms **C)** Representative

698 symptoms caused by inoculation with the  $\Delta exlx-gh5$  mutant strain, where wilt often remains

699 localized to the inoculated leaf without causing systemic wilt symptoms. **D)** Visible *E.*

700 *tracheiphila* oozing from xylem in all vascular bundles of a symptomatic plant after a horizontal

701 stem cross section cut. **E)** 20X confocal microscopy image of a longitudinal section of a

702 symptomatic, *E. tracheiphila* infected *Cucurbita pepo* stem. Image is falsely colored so that plant

703 structures are shown in blue and live *E. tracheiphila* bacterial cells are red.

704

705 **Figure 5. Systemic colonization capability of Wt and  $\Delta exlx-gh5$  strains.**

706 Squash seedlings were inoculated with either Wt or  $\Delta exlx-gh5$ . At 12 days post inoculation

707 (DPI), bacterial concentration was determined in the inoculation site and in a petiole of a second,

708 non-inoculated leaf. Mean  $\pm$  SE are plotted, and grey circles are individual biological replicates

709 (Sample sizes, n=9 per treatment). Y-axis is the  $\log_{10}$  CFU/gram fresh weight and is scaled to the

710 lower limit of detection for the assay ( $\log_{10}$ CFU/gram fresh weight = 3). Brackets indicate

711 pairwise statistical comparisons (Dunn's test) between two groups: \*\*  $P < 0.005$ ; ns, non

712 significant.

713

714 **Figure 6. Correlation of  $\Delta exlx-gh5$  concentration with symptom severity.** Thirty squash  
715 seedlings were inoculated with  $\Delta exlx-gh5$ , and at 21 days post inoculation (DPI) all plants were  
716 scored according to whether they remained healthy (n=8), had developed wilt symptoms only in  
717 the inoculated leaf (n= 12), or had developed systemic wilt symptoms (n=10). CFU were then  
718 counted at the inoculation site and at a second non-inoculated leaf requiring systemic movement.  
719 Bars show mean  $\pm$  SE, and grey circles are individual biological replicates. Y-axis is scaled to  
720 the lower limit of detection for the assay ( $\log_{10}$  CFU/gram fresh weight = 3). Brackets indicate  
721 pairwise statistical comparisons (Dunn's test) between two groups: \*  $P < 0.05$ ; \*\*  $P < 0.005$ ; ns,  
722 non significant.

723

724 **Figure 7. Comparison of virulence between wild type, flagellar deletion mutant and Type**  
725 **IV Pili deletion mutant.** Squash seedlings were inoculated with either Wt, a flagellar deletion  
726 mutant ( $\DeltafliC$ ) or a Type IV Pili deletion mutant ( $\Delta T4P$ ). Inoculated plants were monitored for  
727 first appearance of wilt symptoms in the inoculated leaf, first appearance of systemic wilt  
728 symptoms in a second non-inoculated leaf and plant death for 25 days post inoculation (DPI). All  
729 samples sizes were between 17-22 individual plants per treatment. Summary and statistical  
730 analyses are in Tables 5 and 6.

731

732 **Figure 8. In trans complementation of  $\Delta exlx-gh5$  and Wt. (A)** Plants were singly inoculated  
733 with either Wt or  $\Delta exlx-gh5$ , and **(B)** Plants were co-inoculated with a 1:1 mix of Wt &  $\Delta exlx-$   
734  $gh5$ . In both single and co-inoculation experiments, CFU were counted at 1 day post inoculation  
735 (DPI) from the local inoculation site and at 12 DPI from the petiole of a second non-inoculated

736 leaf. Y-axis is scaled to the lower limit of detection for the assay ( $\log_{10}$  CFU/gram fresh weight =  
737 3). Bars show mean  $\pm$  SE, and grey circles are individual biological replicates. Sample size,  $n = 4$   
738 per treatment.

739 **Figure 9. *In trans* complementation of  $\Delta exlx$  and  $\Delta gh5$ .** Plants were co-inoculated with both  
740 the  $\Delta exlx$  and  $\Delta gh5$  deletion mutants. Inoculated plants were monitored for first appearance of  
741 wilt symptoms in the inoculated leaf, first appearance of systemic wilt symptoms in a second leaf  
742 and plant death for 21 days post inoculation (DPI). Sample sizes are  $n = 18$  per treatments.  
743 Summary and statistical analyses are in Tables 7 and 8.

744

745

## 746 References

- 747 1. Haichar FEZ, Marol C, Berge O, Rangel-castro J, Prosser JI, Balesdent J, Heulin T, Achouak  
748 W. 2008. Plant host habitat and root exudates shape soil bacterial community structure.  
749 The ISME Journal 2:1221-30.
- 750 2. Shi S, Richardson AE, O'Callaghan M, DeAngelis KM, Jones EE, Stewart A, Firestone MK,  
751 Condon LM. 2011. Effects of selected root exudate components on soil bacterial  
752 communities. FEMS Microbiology Ecology 77:600-610.
- 753 3. Lindow SE, Brandl MT. 2003. Microbiology of the Phyllosphere. Applied and  
754 Environmental Microbiology 69:1875-1883.
- 755 4. Huang X, Chaparro JM, Reardon KF, Zhang R. 2014. Rhizosphere interactions: root  
756 exudates, microbes and microbial communities. Botany.
- 757 5. Miwa H, Okazaki S. 2017. How effectors promote beneficial interactions. Current  
758 Opinion in Plant Biology 38:148-154.
- 759 6. Wees SCV, Ent SVd, Pieterse CM. 2008. Plant immune responses triggered by beneficial  
760 microbes. Current Opinion in Plant Biology 11:443-448.
- 761 7. Cosgrove DJ. 2017. Microbial Expansins. Annual Review of Microbiology 71:479-497.
- 762 8. Chase WR, Zhaxybayeva O, Rocha J, Cosgrove DJ, Shapiro LR. 2019. From morphogenesis  
763 to pathogenesis: A cellulose loosening protein is one of the most widely shared tools in  
764 nature. bioRxiv.
- 765 9. Georgelis N, Nikolaidis N, Cosgrove DJ. 2014. Biochemical analysis of expansin-like  
766 proteins from microbes. Carbohydrate Polymers 100:17-23.
- 767 10. Nikolaidis N, Doran N, Cosgrove DJ. 2013. Plant expansins in bacteria and fungi:  
768 evolution by horizontal gene transfer and independent domain fusion. Molecular  
769 Biology and Evolution 31:376-386.

- 770 11. Cosgrove DJ. 2000. Loosening of plant cell walls by expansins. *Nature* 407:321-326.
- 771 12. Sampedro J, Cosgrove DJ. 2005. The expansin superfamily. *Genome biology* 6:242.
- 772 13. Cosgrove DJ. 2015. Plant expansins: diversity and interactions with plant cell walls.
- 773 *Current Opinion in Plant Biology* 25:162-172.
- 774 14. Chen F, Bradford KJ. 2000. Expression of an expansin is associated with endosperm
- 775 weakening during tomato seed germination. *Plant Physiology* 124:1265-1274.
- 776 15. Brummell DA, Harpster MH, Civello PM, Palys JM, Bennett AB, Dunsmuir P. 1999.
- 777 Modification of expansin protein abundance in tomato fruit alters softening and cell wall
- 778 polymer metabolism during ripening. *The Plant Cell* 11:2203-2216.
- 779 16. Cho H-T, Cosgrove DJ. 2000. Altered expression of expansin modulates leaf growth and
- 780 pedicel abscission in *Arabidopsis thaliana*. *Proceedings of the National Academy of*
- 781 *Sciences* 97:9783-9788.
- 782 17. Li Y, Darley CP, Ongaro V, Fleming A, Schipper O, Baldauf SL, McQueen-Mason SJ. 2002.
- 783 Plant expansins are a complex multigene family with an ancient evolutionary origin.
- 784 *Plant Physiology* 128:854-864.
- 785 18. Cosgrove DJ, Li LC, Cho H-T, Hoffmann-Benning S, Moore RC, Blecker D. 2002. The
- 786 growing world of expansins. *Plant and Cell Physiology* 43:1436-1444.
- 787 19. Georgelis N, Nikolaidis N, Cosgrove DJ. 2015. Bacterial expansins and related proteins
- 788 from the world of microbes. *Applied Microbiology and Biotechnology* 99:3807-3823.
- 789 20. Kerff F, Amoroso A, Herman R, Sauvage E, Petrella S, Filée P, Charlier P, Joris B, Tabuchi
- 790 A, Nikolaidis N, Cosgrove DJ. 2008. Crystal structure and activity of *Bacillus subtilis* YoaI
- 791 (EXLX1), a bacterial expansin that promotes root colonization. *Proceedings of the*
- 792 *National Academy of Sciences* 105:16876-16881.
- 793 21. Kende H, Bradford K, Brummell D, Cho H-T, Cosgrove D, Fleming A, Gehring C, Lee Y,
- 794 McQueen-Mason S, Rose J. 2004. Nomenclature for members of the expansin
- 795 superfamily of genes and proteins. *Plant Molecular Biology* 55:311-314.
- 796 22. Saloheimo M, Paloheimo M, Hakola S, Pere J, Swanson B, Nyssönen E, Bhatia A, Ward
- 797 M, Penttilä M. 2002. Swollenin, a *Trichoderma reesei* protein with sequence similarity to
- 798 the plant expansins, exhibits disruption activity on cellulosic materials. *European Journal*
- 799 *of Biochemistry* 269:4202-4211.
- 800 23. Brotman Y, Briff E, Viterbo A, Chet I. 2008. Role of swollenin, an expansin-like protein
- 801 from *Trichoderma*, in plant root colonization. *Plant Physiology* 147:779-789.
- 802 24. Tancos MA, Lowe-Power TM, Peritore-Galve FC, Tran TM, Allen C, Smart CD. 2018.
- 803 Plant-like bacterial expansins play contrasting roles in two tomato vascular pathogens.
- 804 *Molecular Plant Pathology* 19:1210-1221.
- 805 25. Chalupowicz L, Barash I, Reuven M, Dror O, Sharabani G, Gartemann KH, Eichenlaub R,
- 806 Sessa G, Manulis-Sasson S. 2017. Differential contribution of *Clavibacter michiganensis*
- 807 *ssp. michiganensis* virulence factors to systemic and local infection in tomato. *Molecular*
- 808 *Plant Pathology* 18:336-346.
- 809 26. Laine MJ, Haapalainen M, Wahlroos T, Kankare K, Nissinen R, Kassuwi S, Metzler MC.
- 810 2000. The cellulase encoded by the native plasmid of *Clavibacter michiganensis* *ssp.*
- 811 *sepedonicus* plays a role in virulence and contains an expansin-like domain. *Physiological*
- 812 *and Molecular Plant Pathology* 57:221-233.



- 813 27. Hwang IS, Oh E-J, Lee HB, Oh C-S. 2019. Functional characterization of two cellulase  
814 genes in the Gram-positive pathogenic bacterium *Clavibacter michiganensis* for wilting  
815 in tomato. *Molecular Plant-Microbe Interactions* 32:491-501.
- 816 28. Hwang IS, Oh EJ, Kim D, Oh CS. 2018. Multiple plasmid-borne virulence genes of  
817 *Clavibacter michiganensis* ssp. *capsici* critical for disease development in pepper. *New*  
818 *Phytologist* 217:1177-1189.
- 819 29. Olarte-Lozano M, Mendoza-Nuñez MA, Pastor N, Segovia L, Folch-Mallol J, Martínez-  
820 Anaya C. 2014. PcExl1 a novel acid expansin-like protein from the plant pathogen  
821 *Pectobacterium carotovorum*, binds cell walls differently to BsEXLX1. *PLoS One*  
822 9:e95638.
- 823 30. Jahr H, Dreier J, Meletzus D, Bahro R, Eichenlaub R. 2000. The endo- $\beta$ -1, 4-glucanase  
824 CelA of *Clavibacter michiganensis* subsp. *michiganensis* is a pathogenicity determinant  
825 required for induction of bacterial wilt of tomato. *Molecular Plant-Microbe Interactions*  
826 13:703-714.
- 827 31. Shapiro LR, Scully ED, Roberts D, Straub TJ, Geib SM, Park J, Stephenson AG, Rojas ES, Liu  
828 Q, Beattie G, Gleason M, Moraes CMD, Mescher MC, Fleischer SJ, Kolter R, Pierce N,  
829 Zhaxybayeva O. 2015. Draft genome sequence of *Erwinia tracheiphila*, an economically  
830 important bacterial pathogen of cucurbits. *genomeA* 3:e00482-15.
- 831 32. Shapiro LR, Andrade A, Scully ED, Rocha J, Paulson JN, Kolter R. 2018. Draft genome  
832 sequence of an *Erwinia tracheiphila* isolate from an infected muskmelon (*Cucumis*  
833 *melo*). *Microbiology Resource Announcements* 7:e01058-18.
- 834 33. Shapiro L. 2012. A to ZYMV guide to *Erwinia tracheiphila* infection: An ecological and  
835 molecular study. The Pennsylvania State University.
- 836 34. Shapiro LR, Paulson JN, Arnold BJ, Scully ED, Zhaxybayeva O, Pierce N, Rocha J, Klepac-  
837 Ceraj V, Holton K, Kolter R. 2018. An introduced crop plant is driving diversification of  
838 the virulent bacterial pathogen *Erwinia tracheiphila*. *mBio* 9:e01307-18.
- 839 35. Shapiro LR, Mauck KE. 2018. Chemically-mediated Interactions among cucurbits, insects  
840 and microbes, p 55-90. *In* Tabata J (ed), *Chemical Ecology of Insects*. CRC Press.
- 841 36. Smith EF. 1920. An introduction to bacterial diseases of plants. W.B. Saunders Company,  
842 Philadelphia.
- 843 37. Shapiro LR, Scully ED, Straub TJ, Park J, Stephenson AG, Beattie GA, Gleason ML, Kolter  
844 R, Coelho MC, Moraes CMD, Mescher MC, Zhaxybayeva O. 2016. Horizontal gene  
845 acquisitions, mobile element proliferation, and genome decay in the host-restricted  
846 plant pathogen *Erwinia tracheiphila*. *Genome Biology and Evolution* 8:649-664.
- 847 38. Moran NA, Plague GR. 2004. Genomic changes following host restriction in bacteria.  
848 *Current Opinion in Genetics & Development* 14:627-633.
- 849 39. de Mackiewicz D, Gildow FE, Blua M, Fleischer SJ, Lukezic FL. 1998. Herbaceous weeds  
850 are not ecologically important reservoirs of *Erwinia tracheiphila*. *Plant Disease* 82:521-  
851 529.
- 852 40. Shapiro L, Seidl-Adams I, De Moraes C, Stephenson A, Mescher M. 2014. Dynamics of  
853 short-and long-term association between a bacterial plant pathogen and its arthropod  
854 vector. *Scientific Reports* 4.

- 855 41. Garcia-Salazar C, Gildow FE, Fleischer SJ, Cox-Foster D, Lukezic FL. 2000. ELISA versus  
856 immunolocalization to determine the association of *Erwinia tracheiphila* in *Acalymma*  
857 *vittatum* (Coleoptera: Chrysomelidae). *Environmental Entomology* 29:542-550.
- 858 42. Fleischer SJ, de Mackiewicz D, Gildow FE, Lukezic FL. 1999. Serological estimates of the  
859 seasonal dynamics of *Erwinia tracheiphila* in *Acalymma vittata* (Coleoptera:  
860 Chrysomelidae). *Environmental Entomology* 28:470-476.
- 861 43. Sasu M, Seidl-Adams I, Wall K, Winsor J, Stephenson A. 2010. Floral transmission of  
862 *Erwinia tracheiphila* by cucumber beetles in a wild *Cucurbita pepo*. *Environmental*  
863 *Entomology* 39:140-148.
- 864 44. Shapiro LR, Salvaudon L, Mauck KE, Pulido H, De Moraes CM, Stephenson AG, Mescher  
865 MC. 2013. Disease interactions in a shared host plant: effects of pre-existing viral  
866 infection on cucurbit plant defense responses and resistance to bacterial wilt disease.  
867 *PLoS One* 8:e77393.
- 868 45. Shapiro L, De Moraes CM, Stephenson AG, Mescher MC. 2012. Pathogen effects on  
869 vegetative and floral odours mediate vector attraction and host exposure in a complex  
870 pathosystem. *Ecology Letters* 15:1430-1438.
- 871 46. Sasu MA, Ferrari MJ, Du D, Winsor JA, Stephenson AG. 2009. Indirect costs of a  
872 nontarget pathogen mitigate the direct benefits of a virus-resistant transgene in wild  
873 *Cucurbita*. *Proceedings of the National Academy of Sciences* 106:19067-19071.
- 874 47. Marchler-Bauer A, Bo Y, Han L, He J, Lanczycki CJ, Lu S, Chitsaz F, Derbyshire MK, Geer  
875 RC, Gonzales NR. 2016. CDD/SPARCLE: functional classification of proteins via subfamily  
876 domain architectures. *Nucleic Acids Research* 45:D200-D203.
- 877 48. Lombard V, Golaconda Ramulu H, Drula E, Coutinho PM, Henrissat B. 2013. The  
878 carbohydrate-active enzymes database (CAZy) in 2013. *Nucleic Acids Research* 42:D490-  
879 D495.
- 880 49. Aziz R, Bartels D, Best A, DeJongh M, Disz T, Edwards R, Formsma K, Gerdes S, Glass E,  
881 Kubal M, Meyer F, Olsen G, Olson R, Osterman A, Overbeek R, McNeil L, Paarmann D,  
882 Paczian T, Parrello B, Pusch G, Reich C, Stevens R, Vassieva O, Vonstein V, Wilke A,  
883 Zagnitko O. 2008. The RAST Server: Rapid Annotations using Subsystems Technology.  
884 *BMC Genomics* 9:75.
- 885 50. Armenteros JJA, Tsirigos KD, Sønderby CK, Petersen TN, Winther O, Brunak S, von Heijne  
886 G, Nielsen H. 2019. SignalP 5.0 improves signal peptide predictions using deep neural  
887 networks. *Nature Biotechnology* 37:420-423.
- 888 51. Thomas CM, Nielsen KM. 2005. Mechanisms of, and barriers to, horizontal gene transfer  
889 between bacteria. *Nature Reviews Microbiology* 3:711.
- 890 52. Ochman H, Lawrence JG, Groisman EA. 2000. Lateral gene transfer and the nature of  
891 bacterial innovation. *Nature* 405:299-304.
- 892 53. Zhaxybayeva O, Doolittle WF. 2011. Lateral gene transfer. *Current Biology* 21:R242-  
893 R246.
- 894 54. Halpern M, Fridman S, Aizenberg-Gershtein Y, Izhaki I. 2013. Transfer of *Pseudomonas*  
895 *flectens* Johnson 1956 to *Phaseolibacter* gen. nov., in the family Enterobacteriaceae, as  
896 *Phaseolibacter flectens* gen. nov., comb. nov. *International Journal of Systematic and*  
897 *Evolutionary Microbiology* 63:268-273.

- 898 55. Mensi I, Vernerey M-S, Gargani D, Nicole M, Rott P. 2014. Breaking dogmas: the plant  
899 vascular pathogen *Xanthomonas albilineans* is able to invade non-vascular tissues  
900 despite its reduced genome. *Royal Society Open Biology* 4:130116.
- 901 56. Franklin NC. 1978. Genetic fusions for operon analysis. *Annual Review of Genetics*  
902 12:193-221.
- 903 57. Vrisman CM, Deblais L, Rajashekara G, Miller SA. 2016. Differential colonization  
904 dynamics of cucurbit hosts by *Erwinia tracheiphila*. *Phytopathology* 106:684-692.
- 905 58. Cosgrove DJ. 2016. Catalysts of plant cell wall loosening. *F1000Research* 5.
- 906 59. Malinovsky FG, Fangel JU, Willats WG. 2014. The role of the cell wall in plant immunity.  
907 *Frontiers in Plant Science* 5:178.
- 908 60. Bahar O, Goffer T, Burdman S. 2009. Type IV pili are required for virulence, twitching  
909 motility, and biofilm formation of *Acidovorax avenae* subsp. *citrulli*. *Molecular Plant-  
910 Microbe Interactions* 22:909-920.
- 911 61. Burdman S, Bahar O, Parker JK, De La Fuente L. 2011. Involvement of type IV pili in  
912 pathogenicity of plant pathogenic bacteria. *Genes* 2:706-735.
- 913 62. Cursino L, Galvani CD, Athinuwat D, Zaini PA, Li Y, De La Fuente L, Hoch HC, Burr TJ,  
914 Mowery P. 2011. Identification of an operon, Pil-Chp, that controls twitching motility  
915 and virulence in *Xylella fastidiosa*. *Molecular plant-microbe interactions* 24:1198-1206.
- 916 63. Bahar O, Levi N, Burdman S. 2011. The cucurbit pathogenic bacterium *Acidovorax citrulli*  
917 requires a polar flagellum for full virulence before and after host-tissue penetration.  
918 *Molecular Plant-Microbe Interactions* 24:1040-1050.
- 919 64. Ewald PW. 1993. *Evolution of infectious disease*. Oxford University Press.
- 920 65. Mackinnon M, Read AF. 2004. Virulence in malaria: an evolutionary viewpoint.  
921 *Philosophical Transactions of the Royal Society B: Biological Sciences* 359:965-986.
- 922 66. Hinnebusch BJ, Joseph B, Perry RD, Schwan TG. 1996. Role of the *Yersinia pestis* hemin  
923 storage (hms) locus in the transmission of plague by fleas. *Science* 273:367.
- 924 67. Yao C, Zehnder, G., Bauske, E., Kloepper, J. 1996. Relationship between cucumber beetle  
925 (Coleoptera: Chrysomelidae) density and incidence of bacterial wilt of cucurbits. *Journal  
926 of Economic Entomology* 89:510-514.
- 927 68. Pasek S, Risler J-L, Brézellec P. 2006. Gene fusion/fission is a major contributor to  
928 evolution of multi-domain bacterial proteins. *Bioinformatics* 22:1418-1423.
- 929 69. Yang S BP. 2009. The evolutionary history of protein domains viewed by species  
930 phylogeny. *PLoS ONE* 4:e8378.
- 931 70. Boutilier MS, Lee J, Chambers V, Venkatesh V, Karnik R. 2014. Water filtration using  
932 plant xylem. *PLoS One* 9:e89934.
- 933 71. Pérez-Donoso AG, Sun Q, Roper MC, Greve LC, Kirkpatrick B, Labavitch JM. 2010. Cell  
934 wall-degrading enzymes enlarge the pore size of intervessel pit membranes in healthy  
935 and *Xylella fastidiosa*-infected grapevines. *Plant Physiology* 152:1748-1759.
- 936 72. Yadeta K, Thomma B. 2013. The xylem as battleground for plant hosts and vascular wilt  
937 pathogens. *Frontiers in Plant Science* 4.
- 938 73. Secchi F, Pagliarani C, Zwieniecki MA. 2017. The functional role of xylem parenchyma  
939 cells and aquaporins during recovery from severe water stress. *Plant, Cell &  
940 Environment* 40:858-871.

- 941 74. Christman MA, Sperry JS. 2010. Single-vessel flow measurements indicate scalariform  
942 perforation plates confer higher flow resistance than previously estimated. *Plant, Cell &*  
943 *Environment* 33:431-443.
- 944 75. Roper MC. 2011. *Pantoea stewartii* subsp. *stewartii*: lessons learned from a xylem-  
945 dwelling pathogen of sweet corn. *Molecular Plant Pathology* 12:628-637.
- 946 76. Foley JA, DeFries R, Asner GP, Barford C, Bonan G, Carpenter SR, Chapin FS, Coe MT,  
947 Daily GC, Gibbs HK. 2005. Global consequences of land use. *Science* 309:570-574.
- 948 77. Nasaruddin AS, Babler BN, Perna NT, Glasner JD, Charkowski AO. 2019. First report of  
949 *Dickeya dianthicola* causing blackleg on potato in Texas. *Plant Disease*.
- 950 78. Cai W, Srivastava S, Stulberg M, Nakhla M, Rascoe J. 2018. Draft genome sequences of  
951 two *Dickeya dianthicola* isolates from potato. *Genome announcements* 6:e00115-18.
- 952 79. Ma X, Schloop A, Swingle B, Perry KL. 2018. *Pectobacterium* and *Dickeya* responsible for  
953 potato blackleg disease in New York State in 2016. *Plant Disease* 102:1834-1840.
- 954 80. Dean R, Van Kan JA, Pretorius ZA, Hammond-Kosack KE, Di Pietro A, Spanu PD, Rudd JJ,  
955 Dickman M, Kahmann R, Ellis J. 2012. The 'Top 10' fungal pathogens in molecular plant  
956 pathology. *Molecular Plant Pathology* 13:414-430.
- 957 81. Mansfield J, Genin S, Magori S, Citovsky V, Sriariyanum M, Ronald P, Dow M, Verdier V,  
958 Beer SV, Machado MA. 2012. Top 10 plant pathogenic bacteria in molecular plant  
959 pathology. *Molecular Plant Pathology* 13:614-629.
- 960 82. Bae C, Han SW, Song Y-R, Kim B-Y, Lee H-J, Lee J-M, Yeam I, Heu S, Oh C-S. 2015.  
961 Infection processes of xylem-colonizing pathogenic bacteria: possible explanations for  
962 the scarcity of qualitative disease resistance genes against them in crops. *Theoretical*  
963 *and Applied Genetics* 128:1219-1229.
- 964 83. Agrios. 2005. *Plant pathology*, [http://doc18.rupdfbook.com/plant-pathology-fifth-edition-](http://doc18.rupdfbook.com/plant-pathology-fifth-edition-by-george-n-agrios-PDFs-179089.pdf)  
965 [by-george-n-agrios-PDFs-179089.pdf](http://doc18.rupdfbook.com/plant-pathology-fifth-edition-by-george-n-agrios-PDFs-179089.pdf).
- 966 84. Metcalf R, Lampman R. 1989. The chemical ecology of Diabroticites and Cucurbitaceae.  
967 *Experientia* 45:240-247.
- 968 85. Joseph JG, Douglas WT, Edward GR, Anthony IC. 2008. Molecular phylogeny of  
969 rootworms and related galerucine beetles (Coleoptera: Chrysomelidae). *Zoologica*  
970 *Scripta* 37:195-222.
- 971 86. Rand FV, Cash LC. 1920. Some insect relations of *Bacillus tracheiphilus* Erw. Sm.  
972 *Phytopathology* 10:133-140.
- 973 87. Garcia-Salazar C, Gildow FE, Fleischer SJ, Cox-Foster D, Lukezic FL. 2000. Alimentary  
974 canal of adult *Acalymma vittata* (Coleoptera: Chrysomelidae): morphology and potential  
975 role in survival of *Erwinia tracheiphila* (Enterobacteriaceae). *Canadian Journal of*  
976 *Entomology* 132:1-13.
- 977 88. Roberts DC, Fleischer SJ, Sakamoto JM, Rasgon JL. 2018. Potential biological control of  
978 *Erwinia tracheiphila* by internal alimentary canal interactions in *Acalymma vittatum* with  
979 *Pseudomonas fluorescens*. *Journal of Applied Microbiology* 125:1137-1146.
- 980 89. Rand FV, Enlows EMA. 1916. Transmission and control of bacterial wilt of cucurbits.  
981 *Journal of Agricultural Research* 6:7-434.
- 982 90. Rand FV. 1915. Dissemination of bacterial wilt of cucurbits. *Journal of Agricultural*  
983 *Research* 5:257-260.

- 984 91. Whitaker TW, Bemis W. 1975. Origin and evolution of the cultivated *Cucurbita*. Bulletin  
985 of the Torrey Botanical Club:362-368.
- 986 92. Nee M. 1990. The domestication of *Cucurbita* (Cucurbitaceae). Economic Botany 44:56-  
987 68.
- 988 93. Schaefer H, Heibl C, Renner SS. 2009. Gourds afloat: a dated phylogeny reveals an Asian  
989 origin of the gourd family (Cucurbitaceae) and numerous oversea dispersal events.  
990 Proceedings of the Royal Society of London B: Biological Sciences 276:843-851.
- 991 94. Sebastian P, Schaefer H, Telford IRH, Renner SS. 2010. Cucumber (*Cucumis sativus*) and  
992 melon (*C. melo*) have numerous wild relatives in Asia and Australia, and the sister  
993 species of melon is from Australia. Proceedings of the National Academy of Sciences  
994 107:14269-14273.
- 995 95. L.A. N, Trieu DA. 2011. Fusion gardens: Native North America and the Columbian  
996 Exchange. In Smith B (ed), Subsistence Economies of Indigenous North American  
997 Societies: A Handbook. Rowman and Littlefield Publishing Group, Lanham, MD.
- 998 96. Bisognin DA. 2002. Origin and evolution of cultivated cucurbits. Ciência Rural 32:715-  
999 723.
- 1000 97. Datsenko KA, Wanner BL. 2000. One-step inactivation of chromosomal genes in  
1001 *Escherichia coli* K-12 using PCR products. Proceedings of the National Academy of  
1002 Sciences 97:6640-6645.
- 1003 98. Altschul SF, Gish W, Miller W, Myers EW, Lipman DJ. 1990. Basic local alignment search  
1004 tool. Journal of Molecular Biology 215:403-410.
- 1005 99. Katoh K, Misawa K, Kuma Ki, Miyata T. 2002. MAFFT: a novel method for rapid multiple  
1006 sequence alignment based on fast Fourier transform. Nucleic Acids Research 30:3059-  
1007 3066.
- 1008 100. Capella-Gutiérrez S, Silla-Martínez JM, Gabaldón T. 2009. trimAl: a tool for automated  
1009 alignment trimming in large-scale phylogenetic analyses. Bioinformatics 25:1972-1973.
- 1010 101. Abascal F, Zardoya R, Posada D. 2005. ProtTest: selection of best-fit models of protein  
1011 evolution. Bioinformatics 21:2104-2105.
- 1012 102. Stamatakis A. 2006. RAxML-VI-HPC: maximum likelihood-based phylogenetic analyses  
1013 with thousands of taxa and mixed models. Bioinformatics 22:2688-2690.
- 1014 103. Miller MA, Pfeiffer W, Schwartz T. Creating the CIPRES Science Gateway for inference of  
1015 large phylogenetic trees, p 1-8. In (ed),
- 1016 104. Sukumaran J, Holder MT. 2010. DendroPy: A Python library for phylogenetic computing.  
1017 Bioinformatics 26:1569-1571.
- 1018 105. Team RC. 2015. R: A language and environment for statistical computing. R Foundation  
1019 of Statistical Computing Vienna, Austria.
- 1020 106. Yu G, Smith DK, Zhu H, Guan Y, Lam TTY. 2017. ggtree: an R package for visualization and  
1021 annotation of phylogenetic trees with their covariates and other associated data.  
1022 Methods in Ecology and Evolution 8:28-36.
- 1023 107. Guy L, Kultima JR, Andersson SG. 2010. genoPlotR: comparative gene and genome  
1024 visualization in R. Bioinformatics 26:2334-2335.
- 1025 108. Philippe N, Alcaraz J-P, Coursange E, Geiselmann J, Schneider D. 2004. Improvement of  
1026 pCVD442, a suicide plasmid for gene allele exchange in bacteria. Plasmid 51:246-255.

- 1027 109. Lagendijk EL, Validov S, Lamers GE, De Weert S, Bloemberg GV. 2010. Genetic tools for  
1028 tagging Gram-negative bacteria with mCherry for visualization in vitro and in natural  
1029 habitats, biofilm and pathogenicity studies. FEMS Microbiology Letters 305:81-90.  
1030 110. Machin D, Cheung YB, Parmar M. 2006. Survival analysis: a practical approach. John  
1031 Wiley & Sons.  
1032



A.

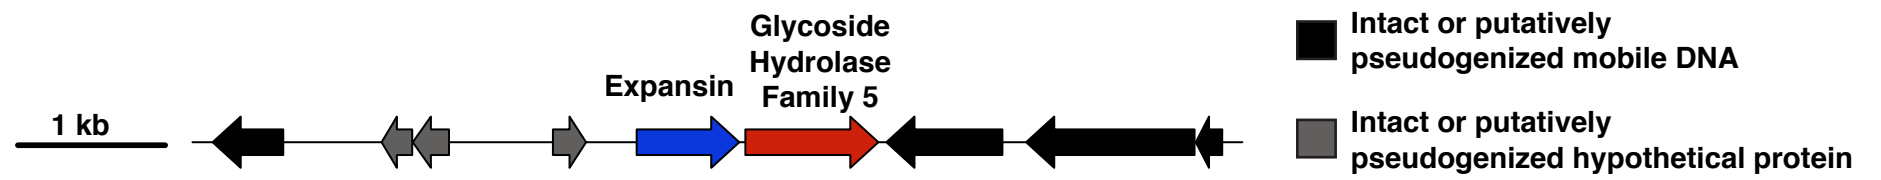

bioRxiv preprint doi: <https://doi.org/10.1101/681643>; this version posted July 2, 2019. The copyright holder for this preprint (which was not certified by peer review) is the author/funder, who has granted bioRxiv a license to display the preprint in perpetuity. It is made available under aCC-BY-NC-ND 4.0 International license.

B.

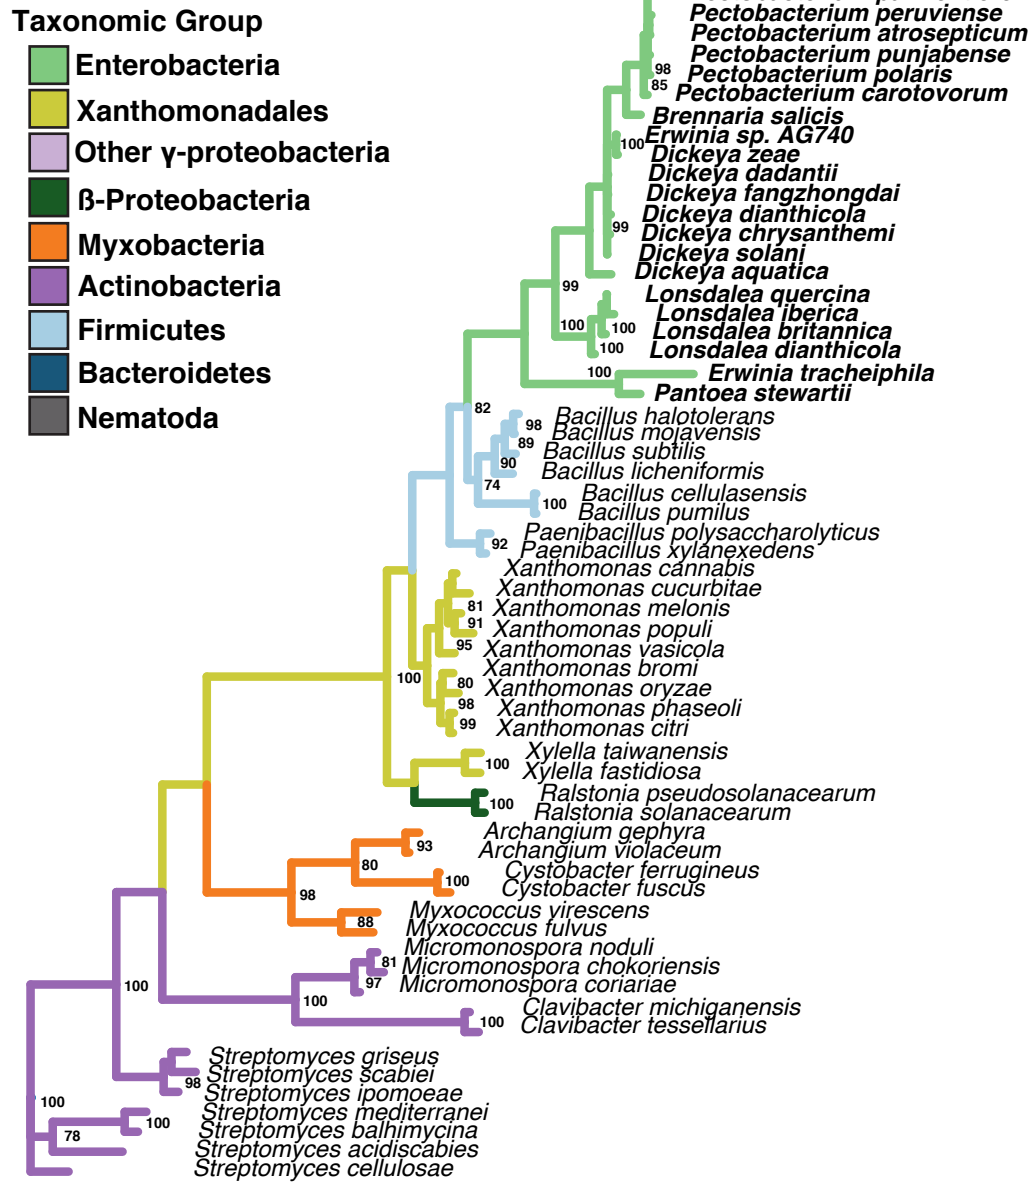

C.

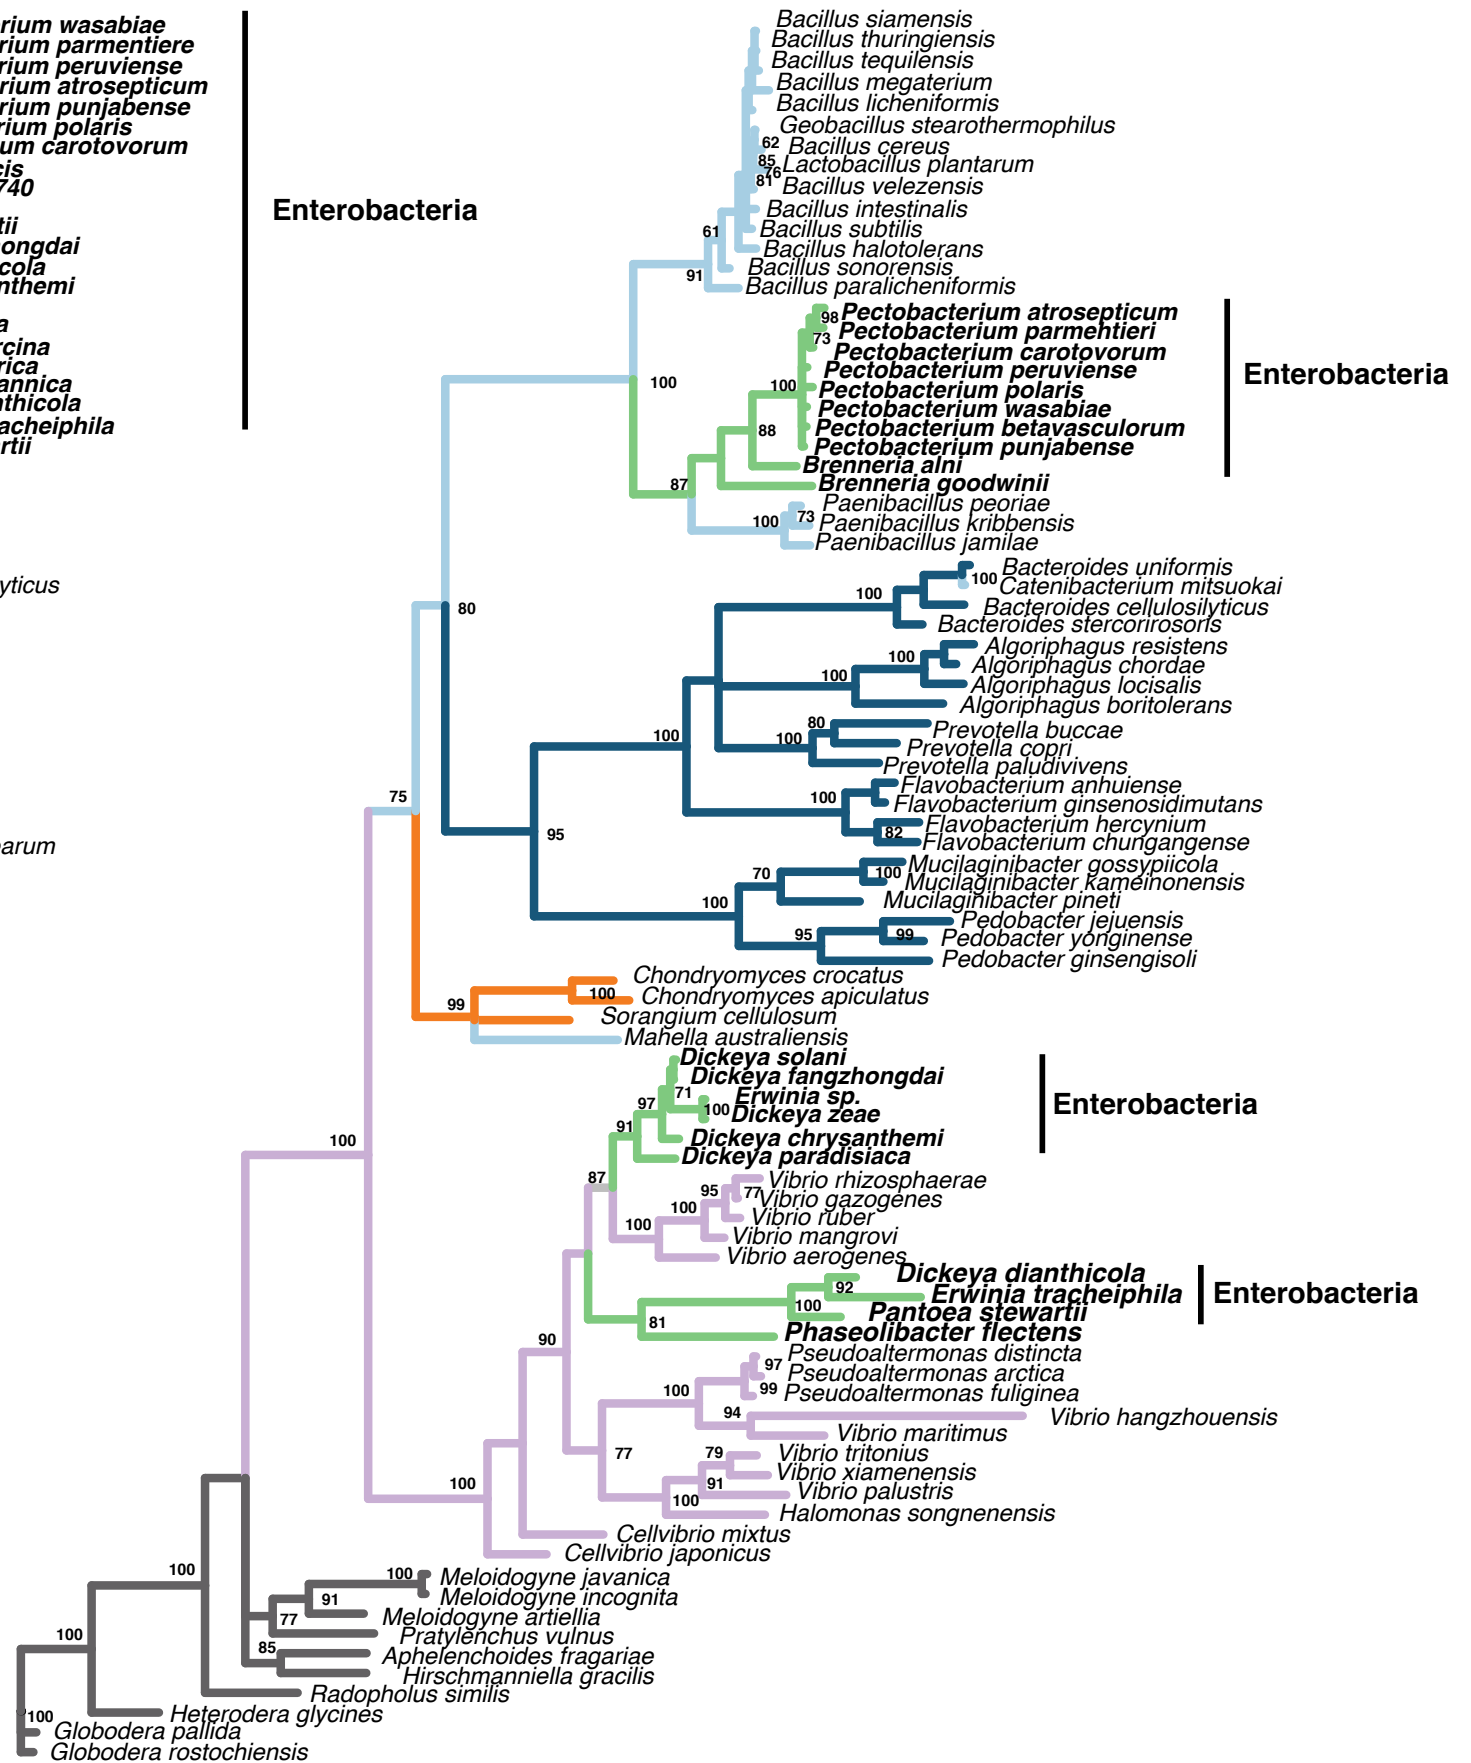

-  Signal Peptide
-  Expansin
-  GH5 (endo-1-4-beta-xylanase A)
-  GH5 (beta-D-glucosidase BglC)
-  GH5
-  Carbohydrate binding module II

*Pantoea ananatis*  
*Pantoea stewartii*  
*Erwinia tracheiphila*  
*Pantoea septica*  
*Pantoea rodasii*  
*Lonsdalea quercina*  
*Lonsdalea iberica*  
*Lonsdalea britannica*  
*Brennaria goodwinii*  
*Pectobacterium carotovorum*  
*Pectobacterium wasabiae*  
*Pectobacterium betavasculorum*  
*Pectobacterium peruvienne*  
*Brennaria rubrifaciens*  
*Brennaria salicis*  
*Dickeya solani*  
*Dickeya zeae*  
*Dickeya dianthicola*  
*Xanthomonas translucens*  
*Xanthomonas oryzae*  
*Xanthomonas arboricola*  
*Xanthomonas phaseoli*  
*Xanthomonas campestris*  
*Xanthomonas citri*  
*Xylella fastidiosa*  
*Xylella taiwanensis*  
*Xanthomonas sacchari*  
*Xanthomonas albilineans*  
*Acidovorax radialis*  
*Acidovorax avenae*  
*Acidovorax citrulli*  
*Ralstonia insidiosa*  
*Ralstonia pickettii*  
*Ralstonia pseudosolanacearum*  
*Ralstonia solanacearum*  
*Myxococcus fulvus*  
*Myxococcus virescens*  
*Clavibacter michiganensis*  
*Streptomyces scabiei*  
*Streptomyces cellulosae*  
*Streptomyces griseus*  
*Streptomyces ipomoeae*  
*Paenibacillus xylanexedens*  
*Bacillus subtilis*  
*Bacillus halotolerans*  
*Bacillus licheniformis*  
*Bacillus glycinifermentans*  
*Bacillus cellulasensis*  
*Bacillus pumilus*

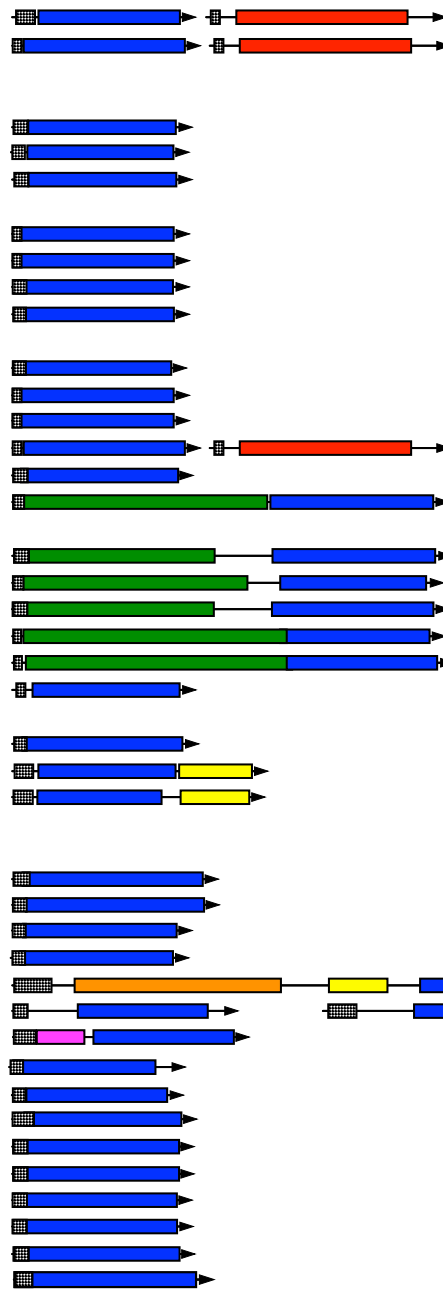

**γ-Proteobacteria**  
(Enterobacteriaceae)

**γ-Proteobacteria**  
(Xanthomonadaceae)

**β-Proteobacteria**

**δ-Proteobacteria**

**Actinobacteria**

**Firmicutes**

0.3 aa/site  
Tree scale

100 aa  
Coding sequence scale



A)

Wilt in inoculated leaf

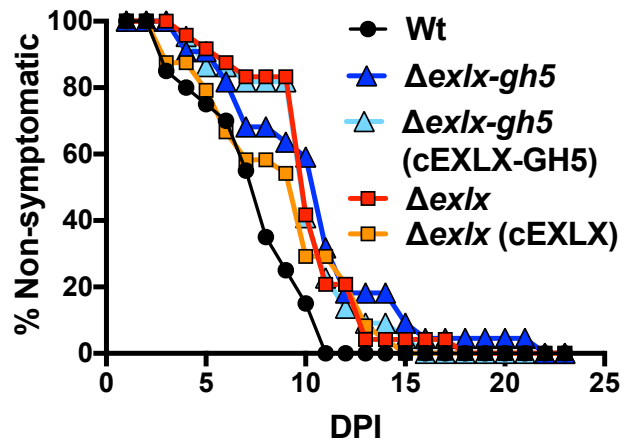

Wilt in second systemic leaf

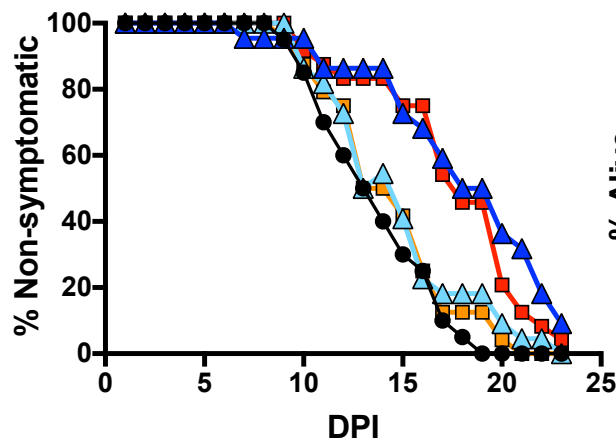

Plant death

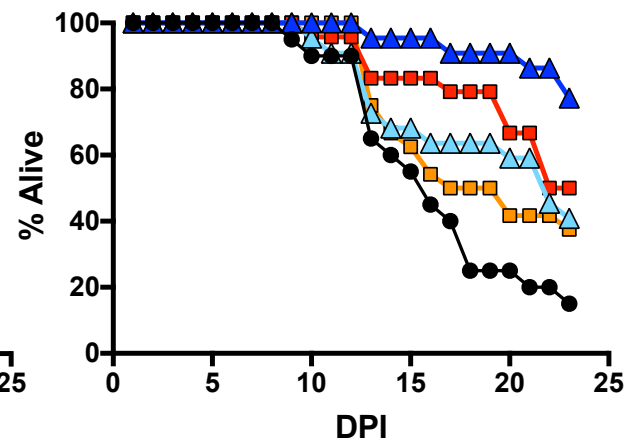

B)

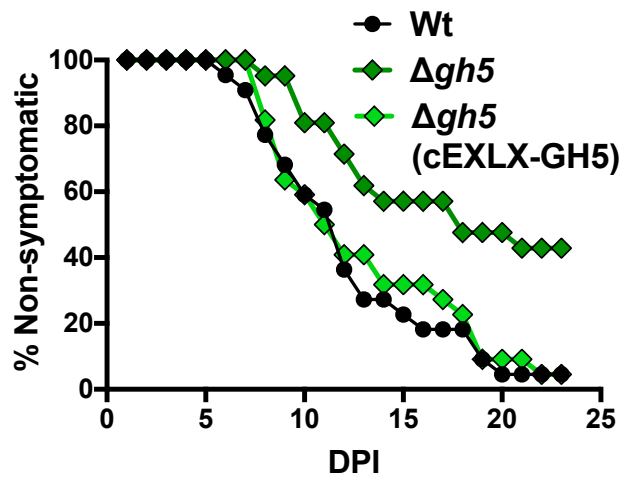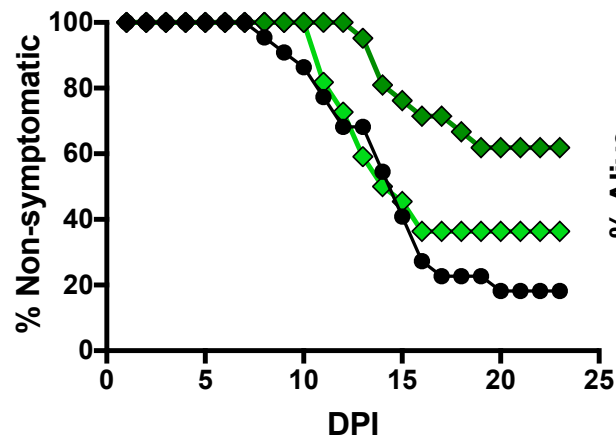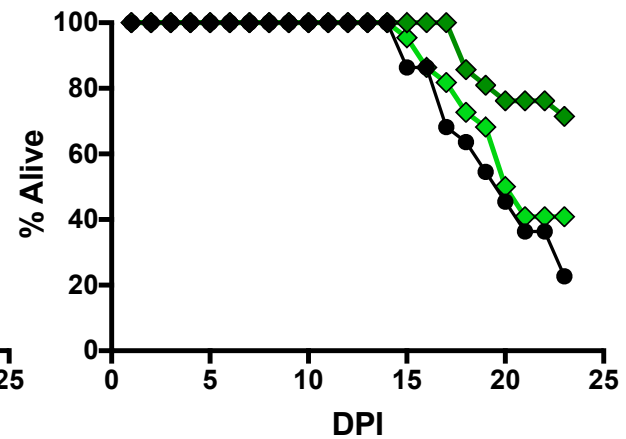

**A) Non inoculated**

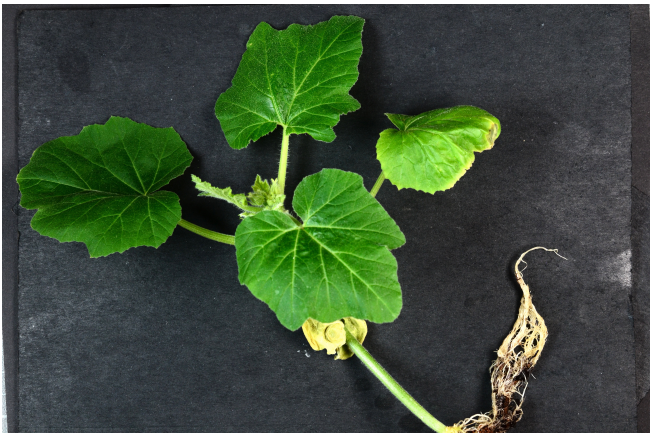

**B) Wt**

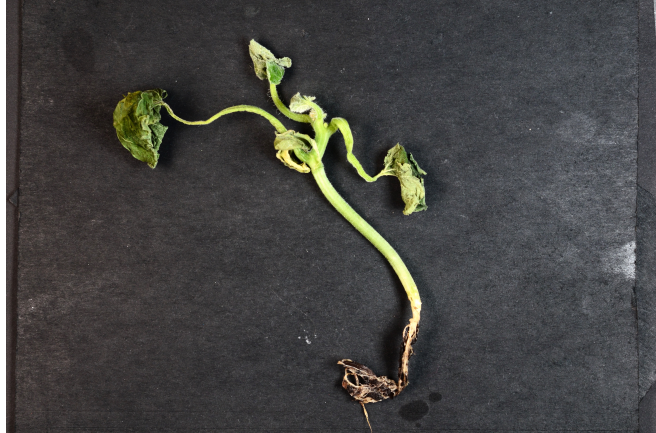

**C)  $\Delta exl1-gh5$**

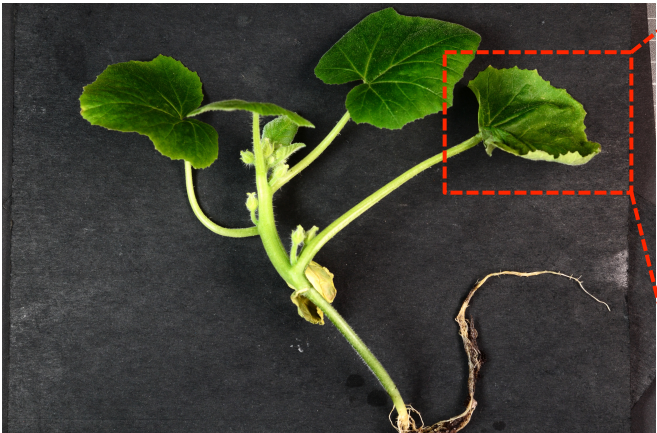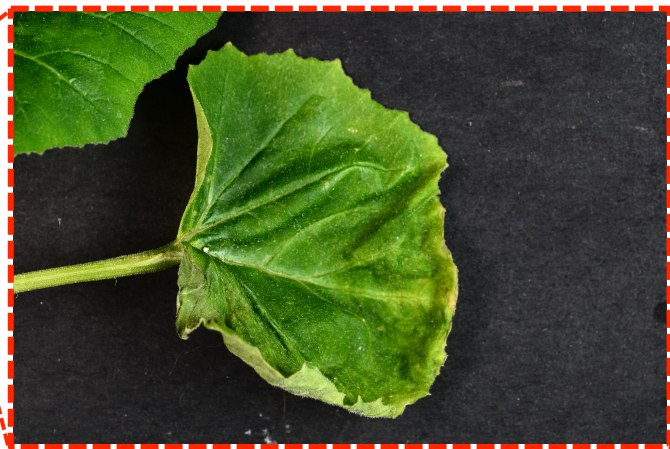

**D)**

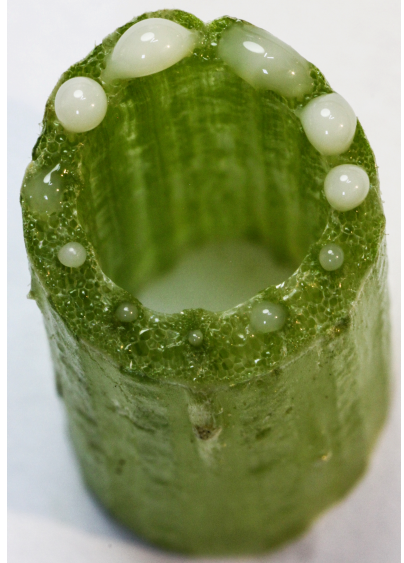

**E)**

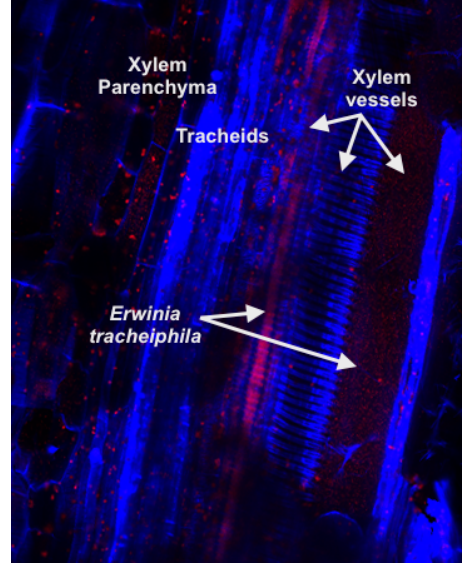

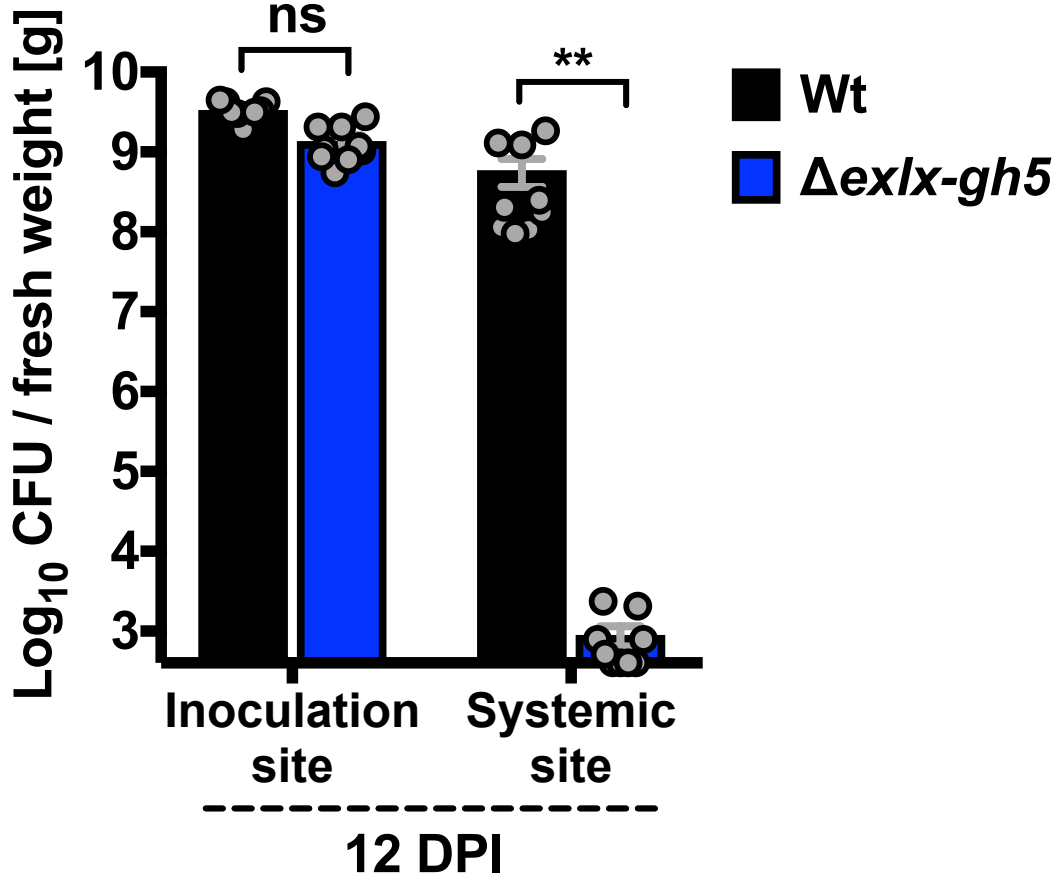

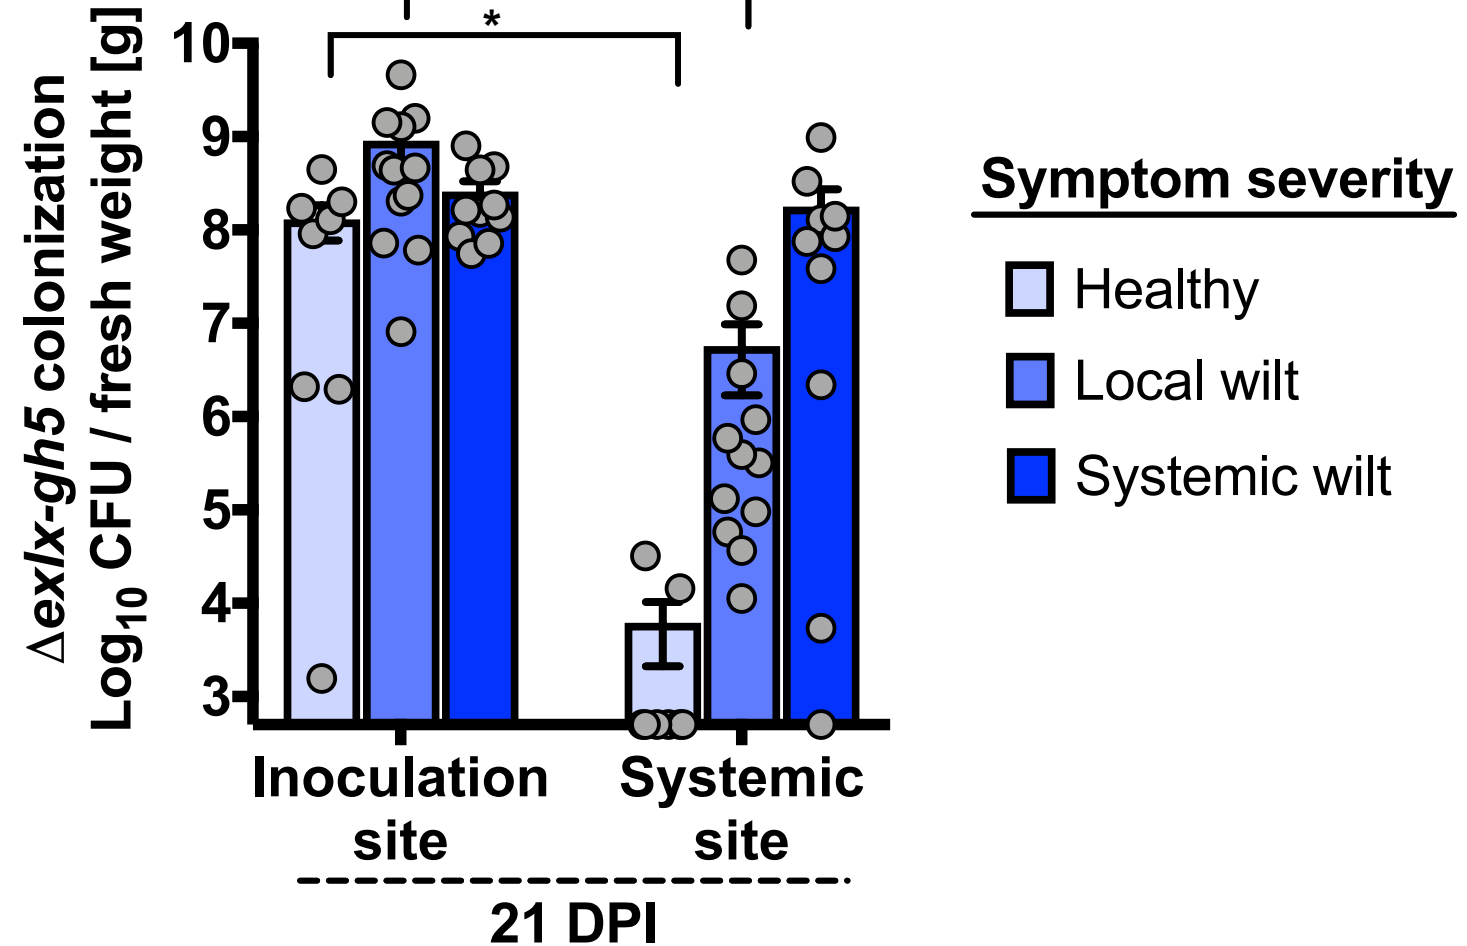

Wilt in inoculated leaf

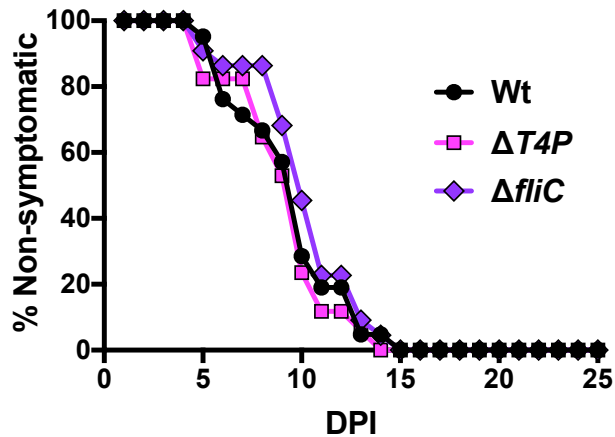

Wilt in second systemic leaf

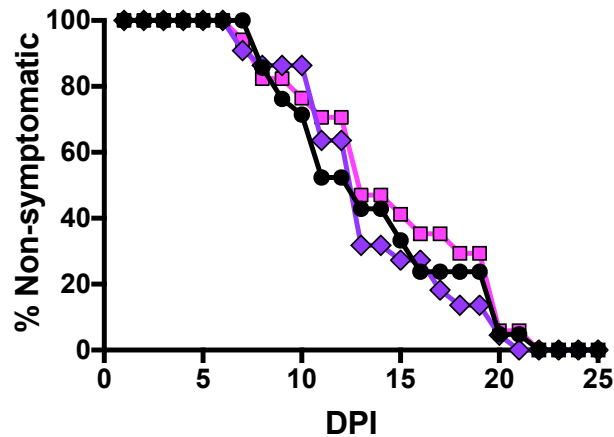

Plant death

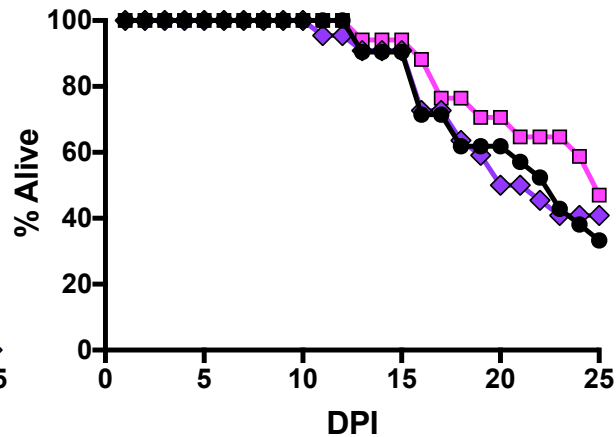

A)

## Single inoculations

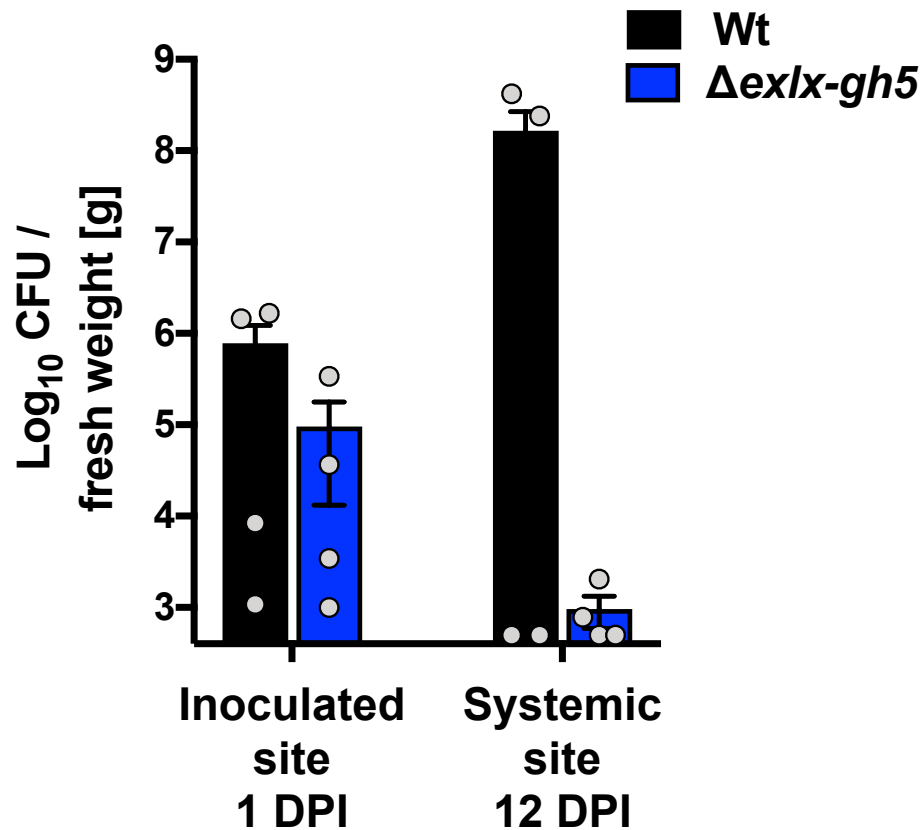

B)

## Co-inoculation

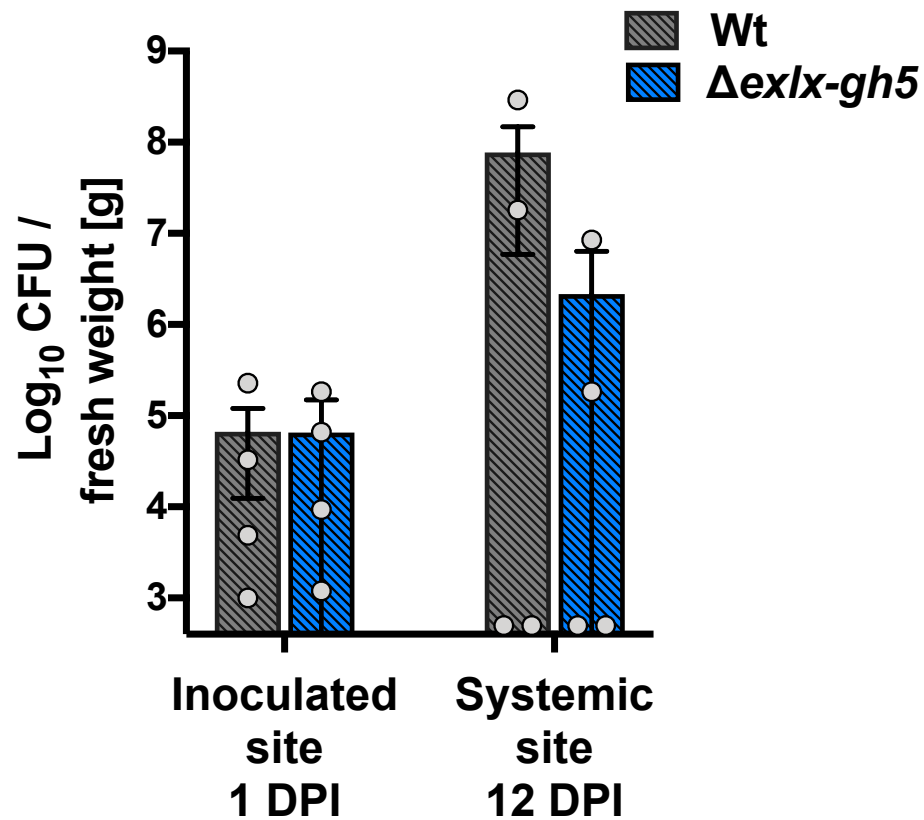

Wilt in inoculated leaf

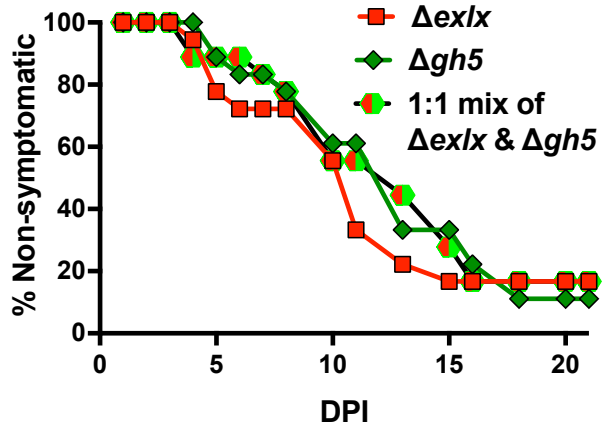

Wilt in systemic second leaf

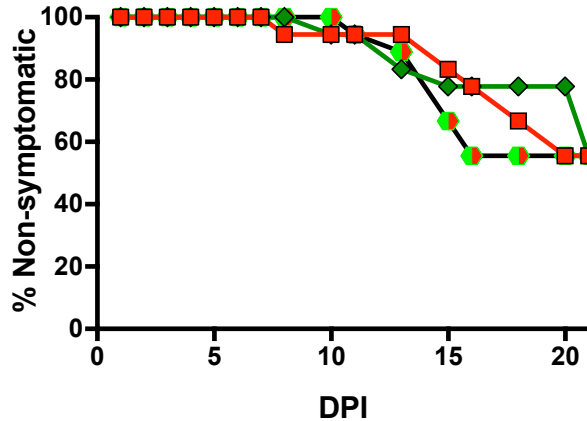

Plant death

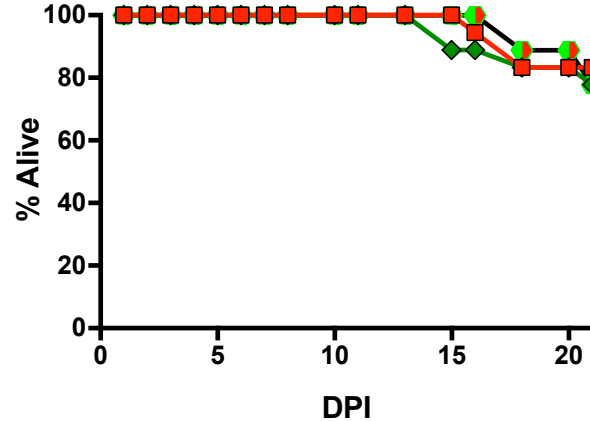

Source: https://www.biorxiv.org/content/10.1101/681643v1.full.pdf
