# Supplementary material for: A horizontally acquired expansin gene increases virulence of the emerging plant pathogen Erwinia tracheiphila
Source: bioRxiv or medRxiv preprint supplement (doi:10.1101/681643), 2019-07-02
Supplement: Supplementary file [file media-1.pdf]

1 **Supplemental material**

2

3 **A horizontally acquired expansin gene increases virulence of the emerging plant**  
4 **pathogen *Erwinia tracheiphila***

5 Jorge Rocha, Lori R. Shapiro, Roberto Kolter

6

7 **Running title:** *An expansin increases Erwinia tracheiphila virulence*

8

9 **Data Deposition Statement:** Analysis scripts and input files associated with  
10 reconstruction of phylogenetic trees are available at

11 <https://github.com/lshapiro31/gh5.expansin.phylogenetics>

12 **Supplemental Tables**

## 13 Supplemental Table 1. Strains and plasmids used in this study.

| Strains                            | Description                                                                                                                                       | Reference  |
|------------------------------------|---------------------------------------------------------------------------------------------------------------------------------------------------|------------|
| <i>Erwinia tracheiphila</i> BHKY   | <i>Erwinia tracheiphila</i> parental Wild type strain. Spontaneous rifampicin resistant. Parental strain for mutants and complemented variants.   | 32         |
| <i>Erwinia tracheiphila</i> BuffGH | <i>Erwinia tracheiphila</i> Wildtype isolate, used for fluorescence visualization of bacterial cells during infection.                            |            |
| $\Delta exlx-gh5$                  | Deletion mutant strain; <i>exlx-gh5:bla</i> genetic exchange. Ampicillin resistant.                                                               | This study |
| $\Delta exlx$                      | Deletion mutant strain; clean deletion in N terminal coding region of <i>exlx</i> .                                                               | This study |
| $\Delta eng$                       | Deletion mutant strain; <i>gh5:bla</i> genetic exchange. Ampicillin resistant.                                                                    | This study |
| $\Delta fliC$                      | Deletion mutant strain; <i>fliC:bla</i> genetic exchange. Ampicillin resistant.                                                                   | This study |
| $\Delta T4P$                       | Deletion mutant strain; <i>T4P:bla</i> genetic exchange. Ampicillin resistant.                                                                    | This study |
| $\Delta exlx-gh5$ (cEXLX-GH5)      | Mutant strain $\Delta exlx-gh5$ , complemented with wildtype promoter and <i>exp-gh5</i> coding region, inserted in a neutral chromosomic region. | This study |
| $\Delta exlx$ (EXLX)               | Mutant strain $\Delta exlx$ , complemented with wildtype promoter and <i>exlx</i> coding region, inserted in a neutral chromosomic region.        | This study |
| $\Delta eng$ (EXLX-ENG)            | Mutant strain $\Delta eng5$ , complemented with wildtype promoter and <i>exlx-gh5</i> coding region, inserted in a neutral chromosomic region.    | This study |
| <i>E. coli</i> Top10               | <i>E. coli</i> strain used for cloning.                                                                                                           |            |
| <i>E. coli</i> PIR1                | <i>E. coli</i> strain for expression of R6K replication origin.                                                                                   |            |
| <i>E. coli</i> S17-1 $\lambda$     | <i>E. coli</i> strain used as donor for conjugation.                                                                                              |            |
| Plasmids                           |                                                                                                                                                   |            |
| pDS132                             | Suicide plasmid for allelic replacement.                                                                                                          | 108        |
| pMP7605                            | Template for the amplification of the <i>mcherry</i> gene                                                                                         | 109        |
| pJR74                              | Derived from pDS132, <i>mcherry</i> gene inserted in the <i>Xba</i> I site.                                                                       | This study |
| pKD46                              | Template for <i>bla</i> gene (ampicillin resistance cassette).                                                                                    | 97         |

|        |                                                                                                                                     |            |
|--------|-------------------------------------------------------------------------------------------------------------------------------------|------------|
| pJR315 | Integration plasmid for <i>E. tracheiphila</i> .                                                                                    | This study |
| pJR150 | Plasmid carrying the construction for gene exchange between the <i>exlx-gh5</i> operon and the <i>bla</i> gene, derived from pJR74. | This study |
| pJR323 | Plasmid carrying the construction for <i>exlx</i> deletion, derived from pJR74.                                                     | This study |
| pJR324 | Plasmid carrying the construction for <i>gh5::bla</i> gene exchange, derived from pJR74.                                            | This study |
| pJR74a | Plasmid carrying the construction for <i>fliC:bla</i> gene exchange, derived from pJR74.                                            | This study |
| pJR149 | Plasmid carrying the construction for Type 4 Pili operon gene exchange with <i>bla</i> gene, derived from pJR74                     | This study |
| pJR358 | Plasmid carrying the construction for <i>exlx-eng</i> operon integration into the chromosome of Et-BHKY, derived from pJR315.       | This study |
| pJR357 | Plasmid carrying the construction for <i>exlx</i> gene integration into the chromosome of Et-BHKY, derived from pJR315.             | This study |

14

15

16 Supplemental Table 2. Oligonucleotides used in this study.

17

| Primer Name                              | Description and sequence (5' to 3')    | Modification      |
|------------------------------------------|----------------------------------------|-------------------|
| <b><i>bla</i> cassette amplification</b> |                                        |                   |
| LS23                                     | acttttcggggaaatgtgc                    |                   |
| LS24                                     | acgttaagggattttggta                    |                   |
| <b><i>mcherry</i> gene amplification</b> |                                        |                   |
| JR72                                     | tcttctagacgtttcttactgtacagctc          | <i>Xba</i> I site |
| JR73                                     | tcttctagaaattcttgacaattaatcatcg        | <i>Xba</i> I site |
| <b><i>exlx-gh5::bla</i> exchange</b>     |                                        |                   |
| LS52 (Fwd 5')                            | acccgtaatgcaccagaac                    |                   |
| LS53 (reamplification)                   | gaggagctcttatttcgatgatggtttatgg        | <i>Sac</i> I site |
| LS54 (Rev 5')                            | gcacatttccccgaaaagtagttaaacagcgcagatgg | LS23 tag          |
| LS55 (Fwd 3')                            | tgacaaaatcccttaacgtacagaggatgccttgtaag | LS24 tag          |
| LS57 (reamplification)                   | gaggagctccgcaaatcatcaccagtcag          | <i>Sac</i> I site |
| LS56 (Rev 3')                            | gaggtatatcccggcctgac                   |                   |
| <b><i>exlx</i> clean deletion</b>        |                                        |                   |
| JR175 (Fwd 5')                           | Cagaactgacgcttacctcc                   |                   |

|                                |                                                           |                            |
|--------------------------------|-----------------------------------------------------------|----------------------------|
| <b>JR176</b>                   |                                                           |                            |
| <b>(reamplification)</b>       | <u>GAGGAGCTC</u> tcgcttcttatagagctgc                      | <i>SacI</i> site           |
| JR194 (Rev 5')                 | gttgagctggttaaggactaagg gaaagtcagagccgctattG              | JR195 tag                  |
| JR195 (Fwd 3')                 | <u>Caatagcggctctgactttcccttagtctctaccagctcaac</u>         | JR194 tag                  |
| <b>JR179</b>                   |                                                           |                            |
| <b>(reamplification)</b>       | <u>GAGGAGCTC</u> atcgataacgctatccacac                     | <i>SacI</i> site           |
| <b>JR180 (Rev 3')</b>          | Gtatttcgtagccaatctctg                                     |                            |
|                                | <b><i>gh5::bla</i> exchange</b>                           |                            |
| <b>JR181 (Fwd 5')</b>          | Gaatcaggcagacttggttc                                      |                            |
| <b>JR182</b>                   |                                                           |                            |
| <b>(reamplification)</b>       | <u>GAGGAGCTC</u> gtgattacaacctgctttcg                     | <i>SacI</i> site           |
|                                | GCACATTTCCCCGAAAAGT                                       |                            |
| <b>JR183 (Rev 5')</b>          | gcatgctgctacagataacc                                      | LS23 tag                   |
|                                | TGACCAAAATCCCTTAACGT                                      |                            |
| <b>JR184 (Fwd 3')</b>          | gataaagcagaaggagcatc                                      | LS24 tag                   |
| <b>JR185</b>                   |                                                           |                            |
| <b>(reamplification)</b>       | <u>GAGGAGCTC</u> ccccactgatgttatcgtc                      | <i>SacI</i> site           |
| <b>JR186 (Rev 3')</b>          | Catgctgttttttatattacctgc                                  |                            |
|                                | <b>Integration plasmid</b>                                |                            |
| <b>JR143 (Fwd 5')</b>          | <u>GAGGAGCTC</u> cttcaaaaatacgttcacacc                    | <i>SacI</i> site           |
| <b>JR144 (Rev 5')</b>          | gttcatacatggtaaacctg <u>AGATCTCTCGAG</u>                  | <i>XhoI</i> , <i>BglII</i> |
|                                | catttatcctgctgatctg                                       | sites, JR145 tag           |
| <b>JR145 (Fwd 3')</b>          | <u>cagatcagcagggataaatg CTCGAGAGATCT</u>                  | <i>XhoI</i> , <i>BglII</i> |
|                                | caggtttgaccatgtatgaac                                     | sites, JR144 tag           |
| <b>JR146 (Rev 3')</b>          | <u>GAGGAGCTC</u> aataccaatcaggaccacac                     | <i>SacI</i> site           |
|                                | <b>Complementation of <i>exlx-gh5</i> and <i>exlx</i></b> |                            |
| <b>JR152 (Fwd)</b>             | CTCCTCGAGggaagatttcatcagcacc                              | <i>XhoI</i> site           |
| <b>JR153 (Rev <i>exlx</i></b>  |                                                           |                            |
| <b>only)</b>                   | CTCCTCGAGctgtcatgtcctgtattatatattgtg                      | <i>XhoI</i> site           |
| <b>JR154 (Rev <i>exlx-</i></b> |                                                           |                            |
| <b><i>eng</i>)</b>             | CTCCTCGAGgacagtaccagtatcctgacg                            | <i>XhoI</i> site           |

18  
19  
20  
21

Supplemental Table 3. Species and sequences included in Figure 2.

| Species                           | Location          | Accession                         | Description            |
|-----------------------------------|-------------------|-----------------------------------|------------------------|
| <i>Erwinia tracheiphila</i>       | Chromosome        | WP_046372116.1,<br>WP_016193008.1 | Expansin - GH5 locus   |
| <i>Pantoea stewartii</i>          | Plasmid<br>pDSJ08 | WP_044243227.1,<br>WP_006122111.1 | Expansin - GH5 locus   |
| <i>Pectobacterium carotovorum</i> | Chromosome        | WP_103860671.1                    | Single expansin domain |
| <i>Dickeya solani</i>             | Chromosome        | WP_022633560.1                    | Single expansin domain |

|                                      |            |                                   |                                        |
|--------------------------------------|------------|-----------------------------------|----------------------------------------|
| <i>Dickeya zae</i>                   | Chromosome | WP_026358096.1                    | Single expansin domain                 |
| <i>Dickeya dianthicola</i>           | Chromosome | WP_024104808.1,<br>WP_103415919.1 | Expansin - GH5 locus                   |
| <i>Lonsdalea quercina</i>            | Chromosome | WP_026740116.1                    | Single expansin domain                 |
| <i>Lonsdalea iberica</i>             |            | WP_094110348.1                    | Single expansin domain                 |
| <i>Lonsdalea britannica</i>          | Chromosome | WP_094118757.1                    | Single expansin domain                 |
| <i>Brenneria salicis</i>             |            | WP_113865163.1                    | Single expansin domain                 |
| <i>Pectobacterium wasabiae</i>       | Chromosome | WP_005968506.1                    | Single expansin domain                 |
| <i>Pectobacterium betavasculorum</i> | Chromosome | WP_010275007.1                    | Single expansin domain                 |
| <i>Pectobacterium peruviane</i>      | Chromosome | WP_113627469.1                    | Single expansin domain                 |
| <i>Brenneria salicis</i>             | Chromosome | WP_113865163.1                    | Single expansin domain                 |
| <i>Xanthomonas sacchari</i>          | Chromosome | WP_043094747.1                    | Single expansin domain                 |
| <i>Xanthomonas albilineans</i>       | Chromosome | WP_045769814.1                    | Single expansin domain                 |
| <i>Xanthomonas translucens</i>       | Chromosome | WP_003477706.1                    | Single expansin domain                 |
| <i>Xanthomonas arboricola</i>        | Chromosome | SUZ34847.1                        | Single expansin domain                 |
| <i>Xanthomonas maliensis</i>         | Chromosome | WP_031340658.1                    | Fused 1,4-beta-cellobiosidase-expansin |
| <i>Xylella fastidiosa</i>            | Chromosome | WP_020851755.1                    | Fused 1,4-beta-cellobiosidase-expansin |
| <i>Xylella taiwanensis</i>           | Chromosome | WP_038269744.1                    | Fused 1,4-beta-cellobiosidase-expansin |
| <i>Xanthomonas oryzae</i>            | Chromosome | WP_131078740.1                    | Fused 1,4-beta-cellobiosidase-expansin |
| <i>Xanthomonas citri</i>             | Chromosome | WP_096035367.1                    | Fused 1,4-beta-cellobiosidase-expansin |
| <i>Xanthomonas campestris</i>        | Chromosome | KFA09681.1                        | Fused 1,4-beta-cellobiosidase-         |

|                                     |              |                            | expansin                                  |
|-------------------------------------|--------------|----------------------------|-------------------------------------------|
| <i>Xanthomonas phaseoli</i>         | Chromosome   | WP_017161821.1             | Fusioned 1,4-beta-cellobiosidase-expansin |
| <i>Ralstonia pseudosolanacearum</i> | Chromosome   | WP_120452416.1             | Single expansin domain                    |
| <i>Ralstonia solanacearum</i>       | Chromosome   | WP_134927564.1             | Single expansin domain                    |
| <i>Myxococcus virescens</i>         | Chromosome   | WP_090491481.1             | Single expansin domain                    |
| <i>Myxococcus fulvus</i>            | Chromosome   | WP_046714021.1             | Single expansin domain                    |
| <i>Clavibacter michiganensis</i>    | Plasmid pCM1 | PRJNA19643, AM711865.1     | Multidomain GH5-CBMII-expansin,           |
|                                     | Chromosome   | 4JCW_A                     | Single expansin domain                    |
| <i>Streptomyces scabiei</i>         | Chromosome   | FN554889.1, WP_013005169.1 | Single expansin domain                    |
|                                     | Chromosome   | CBG75940.1                 | Single expansin domain                    |
| <i>Streptomyces cellulosa</i>       | Chromosome   | WP_030660953.1             | SSL4- expansin fusion                     |
| <i>Streptomyces griseus</i>         | Chromosome   | WP_051866281.1             | Single expansin domain                    |
| <i>Streptomyces ipomoeae</i>        | Chromosome   | WP_009327266.1             | Single expansin domain                    |
| <i>Paenibacillus xylanexedens</i>   | Chromosome   | WP_124115839.1             | Single expansin domain                    |
| <i>Bacillus licheniformis</i>       | Chromosome   | WP_073425687.1             | Single expansin domain                    |
| <i>Bacillus glycinifermentans</i>   | Chromosome   | WP_048355312.1             | Single expansin domain                    |
| <i>Bacillus pumilus</i>             | Chromosome   | WP_024718945.1             | Single expansin domain                    |
| <i>Bacillus cellulosensis</i>       | Chromosome   | APP16610.1                 | Single expansin domain                    |
| <i>Bacillus halotolerans</i>        | Chromosome   | WP_106021706.1             | Single expansin domain                    |
| <i>Bacillus subtilis</i>            | Chromosome   | WP_128737925.1             | Single expansin domain                    |
| <i>Acidovorax avenae</i>            | Chromosome   | WP_107177641.1             | Fusioned CelA1 cellulase - expansin       |
| <i>Acidovorax radialis</i>          | Chromosome   | WP_010459029.1             | Single expansin                           |

|                           |            |            |                                     |
|---------------------------|------------|------------|-------------------------------------|
|                           |            |            | domain                              |
| <i>Acidovorax citruli</i> | Chromosome | ABM33954.1 | Fused CelA1<br>cellulase - expansin |

22

23

24

25 Supplemental Figures and Legends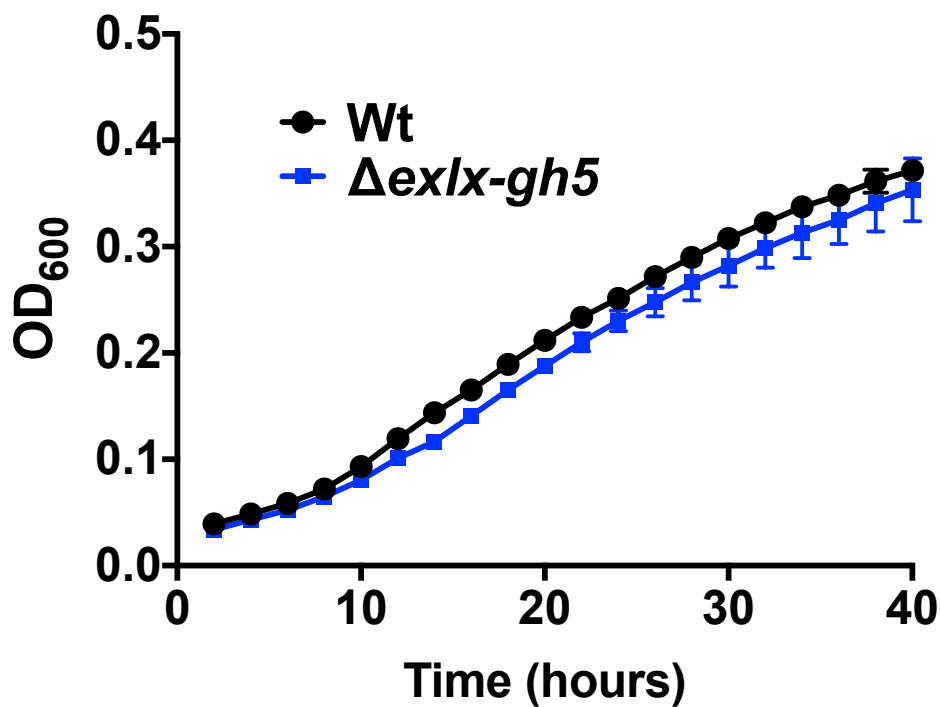

26

27 **Supplemental Figure 1. *In vitro* growth of Wt and Δexlx-gh5.** A single colony of Wt or Δexlx-  
28 gh5 strains were picked into 3 ml of liquid Kb media and grown for 48 h at 25°C with shaking.  
29 Then, 1 ml of each culture was washed once with 1 volume of PBS and diluted with fresh KB  
30 media to OD<sub>600</sub> of 0.05. Four replicates of 300 μl were placed in a clear 96-well microplate and  
31 growth was followed in these standing liquid cultures using a microplate reader, by measuring  
32 absorbance at 600 nm every 2 h for 40 h at a constant temperature of 25°C. Average ± SD is  
33 shown.

34

35



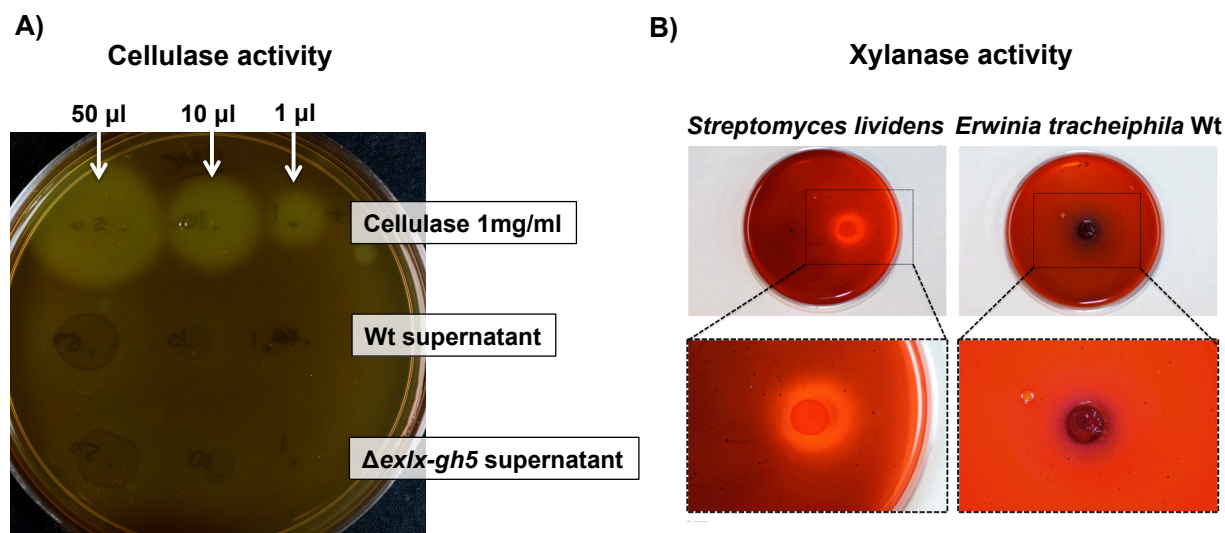

36

37 **Supplemental Figure 2. Tests to detect *E. tracheiphila* cellulase and xylanase activity *in***38 ***vitro*. A)** Commercial cellulase and supernatants of Wt and the  $\Delta$ exlx-gh5 mutant were spotted in

39 media containing agar and 1% CMC, incubated at 30°C for 48 h, and then flooded with Gram's

40 Iodine. Halos were imaged after 24 h at RT. **B)** *E. tracheiphila* and the xylan degrading species41 *Streptomyces lividens* were grown in KB agar. An overlay of 1% xylan and 1% agar was spread

42 on top of the colonies. Plates were incubated at 30°C for 48 h, and flooded with 1% Congo Red.

43 Halos were imaged and measured after 24 h at room temperature.

44
